# Supplementary material
Source: PubMed Central journal article supplement (PMC2547484)
Supplement: NIHMS54435-supplement-1.pdf [file NIHMS54435-supplement-1.pdf]

# Enantioselective Claisen Rearrangement with a Hydrogen-Bond Donor Catalyst

Christopher Uyeda and Eric N. Jacobsen\*

## Supporting Information

|                                                                                            |     |
|--------------------------------------------------------------------------------------------|-----|
| 1. General Information                                                                     | S1  |
| 2. Reaction and Catalyst Optimization                                                      | S2  |
| 3. Catalyst Preparation and Characterization Data                                          | S4  |
| 4. General Procedure and Data for the Achiral Claisen Rearrangement                        | S8  |
| 5. Substrate Preparation and Characterization Data                                         | S9  |
| 6. General Procedure for the Asymmetric Claisen Rearrangement and Product Characterization | S10 |
| 7. Determination of the Absolute Stereochemistry                                           | S32 |
| 8. X-ray Structure of <b>2</b>                                                             | S33 |
| 9. Computational Modeling of the Guanidinium-Bound Transition State                        | S36 |
| 10. References                                                                             | S37 |

## 1. General Information

**General Procedure.** Unless specified otherwise, all reactions were performed under a nitrogen atmosphere in a flame-dried round-bottom flask sealed with a rubber septum. Air- and moisture-sensitive liquids were transferred using stainless steel syringes or cannulae. Flash chromatography was performed using silica gel 60 (230-300 mesh) from EM science.

**Materials.** Commercial reagents were purchased from Sigma Aldrich, VWR, and Acros and used as received. Oxygen- and moisture-free diethyl ether, tetrahydrofuran, dichloromethane, dimethylformamide, methanol, and toluene were obtained from a Glass Contour solvent purification system consisting of columns packed with alumina, Q5 reactant, and molecular sieves as appropriate to the solvent. Commercially available HPLC grade hexanes and anhydrous dimethylsulfoxide were used without purification. Et<sub>3</sub>N was freshly distilled over CaH<sub>2</sub> prior to use. 1,2-*trans*-diaminocyclohexane,<sup>1</sup> Cbz-NCS,<sup>2</sup> sodium BArF,<sup>3</sup> and diazomethane<sup>4</sup> were prepared according to procedures found in the literature.

**Instrumentation.** Proton nuclear magnetic resonance (<sup>1</sup>HNMR) spectra and carbon nuclear magnetic resonance (<sup>13</sup>CNMR) spectra were recorded on a Varian Mercury-400 (400 MHz) or Inova-500 (500 MHz) NMR spectrometer. Chemical shifts for protons are reported in parts per million downfield from tetramethylsilane and are referenced to the NMR solvent residual peak (CHCl<sub>3</sub>: δ7.26, CD<sub>3</sub>OD: δ3.31). Chemical shifts for carbons are reported in parts per million downfield from tetramethylsilane and are referenced to the carbon resonances of the NMR solvent (CDCl<sub>3</sub>: δ77.16, CD<sub>3</sub>OD: δ49.00). Data are represented as follows: chemical shift, integration, multiplicity (br = broad, s = singlet, d = doublet, t = triplet, q = quartet, p = pentet, m = multiplet), and coupling constants in Hertz (Hz). The mass spectroscopic data were obtained at the Harvard University mass spectrometry facility using an Agilent 6120 Quadrupole LC/MS instrument. Infrared (IR) spectra were obtained using a Mattson Galaxy Series FTIR 3000 spectrophotometer referenced to a polystyrene standard. Data are represented as follows: frequency of absorption (cm<sup>-1</sup>), intensity of absorption (s = strong, m = medium, w = weak).

**Abbreviations used:** ee = enantiomeric excess, GC = gas chromatography, HPLC = high-performance liquid chromatography, TLC = thin-layer chromatography, BArF = tetrakis[3,5-bis(trifluoromethyl)phenyl]borate, THF = tetrahydrofuran, DMSO = dimethylsulfoxide, Cbz = benzyloxycarbonyl, Ms = methanesulfonyl, KHMDS = potassium bis(trimethylsilyl)amide, EDC = 1-(3-(dimethyl-amino)propyl)-3-ethyl-carbodiimide hydrochloride

## 2. Reaction and Catalyst Optimization

### Screen of Hydrogen-Bond Donors

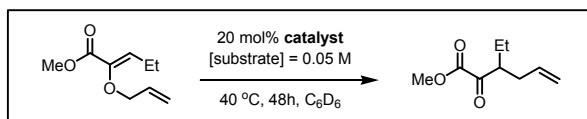

Background: 13%

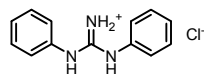

11% Conversion

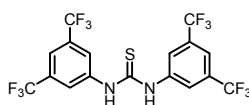

35% Conversion

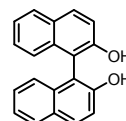

12% Conversion

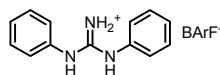

73% Conversion

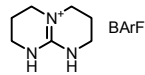

27% Conversion

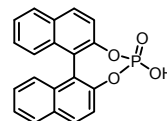

12% Conversion

### Optimization of Reaction Parameters

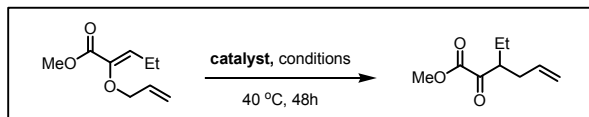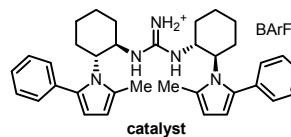

| catalyst Loading | concentration | solvent            | conversion | ee           |
|------------------|---------------|--------------------|------------|--------------|
| 0 mol%           | 0.05 M        | hexane             | 6%         | -            |
| 5 mol%           | 0.05 M        | hexane             | 20%        | + 42%        |
| 10 mol%          | 0.05 M        | hexane             | 32%        | + 48%        |
| <b>20 mol%</b>   | <b>0.05 M</b> | <b>hexane</b>      | <b>66%</b> | <b>+ 58%</b> |
| 50 mol%          | 0.05 M        | hexane             | 94%        | + 63%        |
| 20 mol%          | neat          | hexane             | 73%        | + 23%        |
| 20 mol%          | 1.0 M         | hexane             | 69%        | + 39%        |
| 20 mol%          | 0.5 M         | hexane             | 71%        | + 47%        |
| 20 mol%          | 0.025 M       | hexane             | 50%        | + 55%        |
| 20 mol%          | 0.05 M        | pentane            | 50%        | + 56%        |
| 20 mol%          | 0.05 M        | heptane            | 60%        | + 53%        |
| 20 mol%          | 0.05 M        | cyclohexane        | 58%        | + 55%        |
| 20 mol%          | 0.05 M        | dichloromethane    | 52%        | + 40%        |
| 20 mol%          | 0.05 M        | 1,2-dichloroethane | 48%        | + 37%        |
| 20 mol%          | 0.05 M        | chloroform         | 46%        | + 30%        |
| 20 mol%          | 0.05 M        | benzene            | 50%        | + 46%        |
| 20 mol%          | 0.05 M        | toluene            | 49%        | + 47%        |
| 20 mol%          | 0.05 M        | trifluorotoluene   | 53%        | + 49%        |
| 20 mol%          | 0.05 M        | TBME               | 13%        | N.D.         |

## Counterion Screen

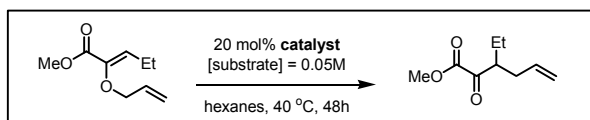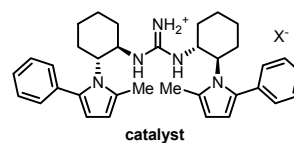

|                                                                   |               |  |                         |
|-------------------------------------------------------------------|---------------|--|-------------------------|
| X <sup>-</sup> : Cl <sup>-</sup>                                  | 6% Conversion |  | 7% Conversion           |
| BF <sub>4</sub> <sup>-</sup>                                      | 8% Conversion |  |                         |
| SbF <sub>6</sub> <sup>-</sup>                                     | 8% Conversion |  |                         |
| [(CF <sub>3</sub> ) <sub>3</sub> CO] <sub>4</sub> Al <sup>-</sup> | 8% Conversion |  | 66% Conversion (58% ee) |

## Screen of Chiral Guanidinium BArF<sup>-</sup> Catalysts

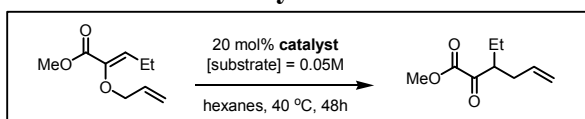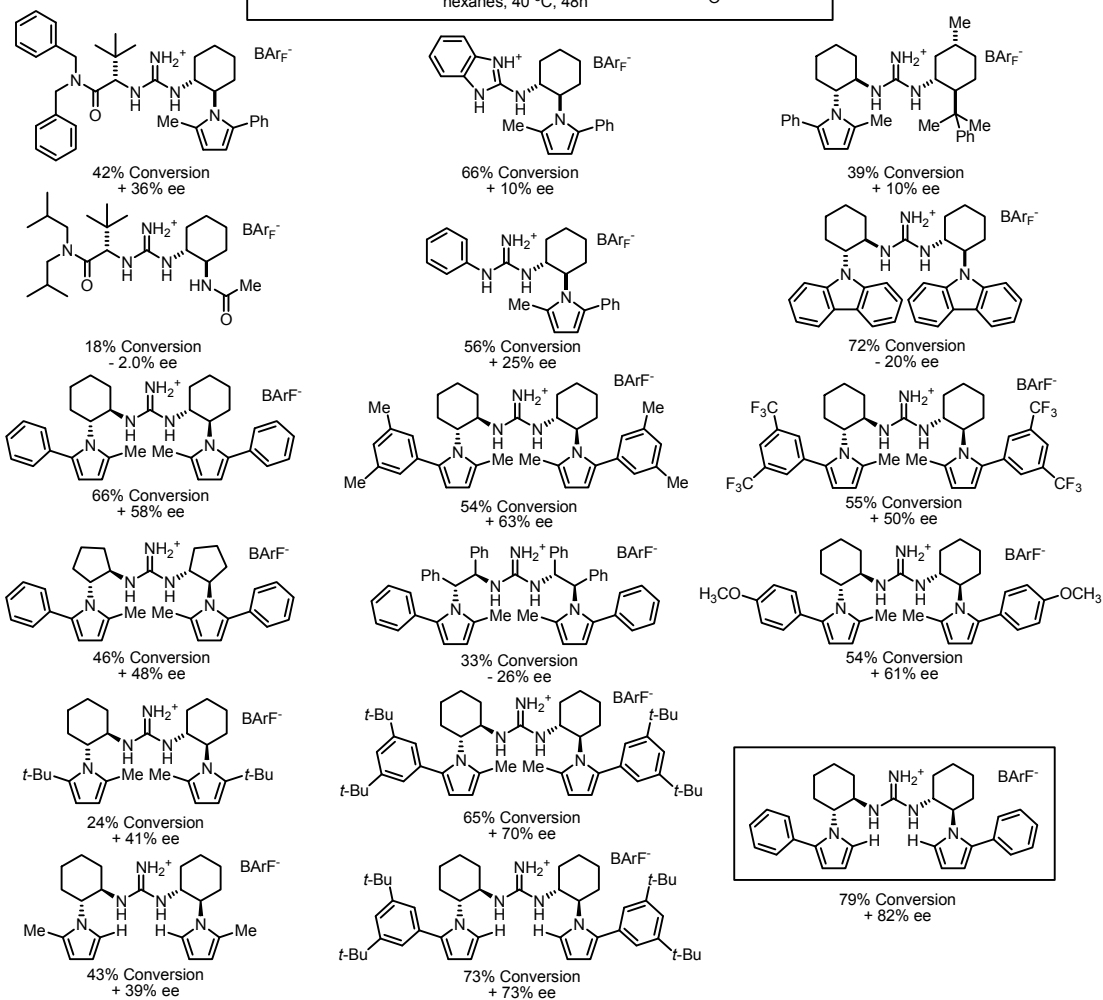

Conversions measured by <sup>1</sup>HNMR integration. Enantiomeric excesses determined by chiral GC (γ-TA, 80 °C, t<sub>r</sub>(major) = 23.3 min, t<sub>r</sub>(minor) = 25.9 min).

### 3. Catalyst Preparation and Characterization Data

#### Preparation of Achiral Guanidinium Catalyst 1

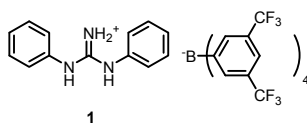

N,N'-diphenylguanidine (422.5 mg, 2.0 mmol, 1.0 eq) was suspended in 20 mL of Et<sub>2</sub>O. 1M HCl in Et<sub>2</sub>O (4.0 mL, 4.0 mmol, 2.0 eq) was added dropwise with stirring at room temperature. The solvent was removed under reduced pressure, and the residue was taken up in 10 mL of CH<sub>2</sub>Cl<sub>2</sub>. NaBARf (1.7724 g, 2.0 mmol, 1.0 eq) was added in one portion, and the mixture was stirred for 15 min at room temperature. The precipitated sodium chloride was removed by filtration through a celite plug (eluting with CH<sub>2</sub>Cl<sub>2</sub>), and the filtrate was concentrated. The crude product was purified by flash chromatography to remove any trace amounts of residual starting materials (eluting with a solvent mixture of 4% MeOH in CH<sub>2</sub>Cl<sub>2</sub>). The product obtained after column chromatography was dissolved in 2 mL of benzene, frozen at -78 °C, and placed under vacuum to remove the benzene, yielding a white solid. <sup>1</sup>HNMR (400 MHz, CD<sub>3</sub>OD): δ 7.59 (12H, m), 7.48 (4H, t, J = 7.9 Hz), 7.35 (6H, m); <sup>13</sup>C{<sup>1</sup>H}NMR (100 MHz, CD<sub>3</sub>OD): δ 162.9 (q, <sup>1</sup>J<sub>B-C</sub> = 49.6 Hz), 156.5, 136.4, 135.8, 131.1, 130.5 (q, <sup>2</sup>J<sub>C-F</sub> = 31.8 Hz), 128.6, 125.8 (q, <sup>1</sup>J<sub>C-F</sub> = 270.0 Hz), 118.5; <sup>11</sup>BNMR (96 MHz, CD<sub>3</sub>OD): δ -6.71 (s); <sup>19</sup>FNMR (282 MHz, CD<sub>3</sub>OD): δ -64.7 (s); HRMS (ESI) [M-BARf]<sup>+</sup> calculated for C<sub>45</sub>H<sub>26</sub>BF<sub>24</sub>N<sub>3</sub>: 212.11822, found: 212.11872; FTIR (neat, cm<sup>-1</sup>): 3500 (w), 3424 (w), 3400 (w), 1628 (m), 1590 (m), 1356 (s), 1278 (s), 1122 (s).

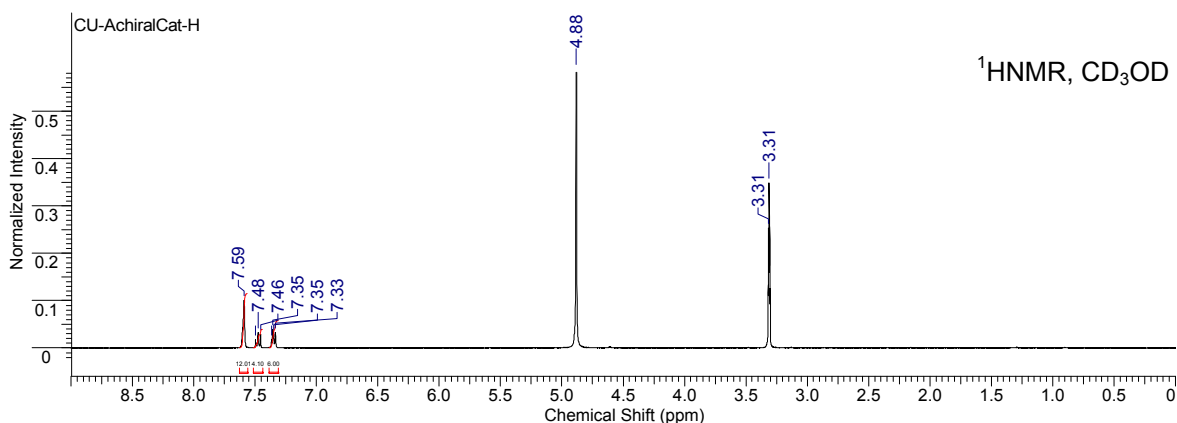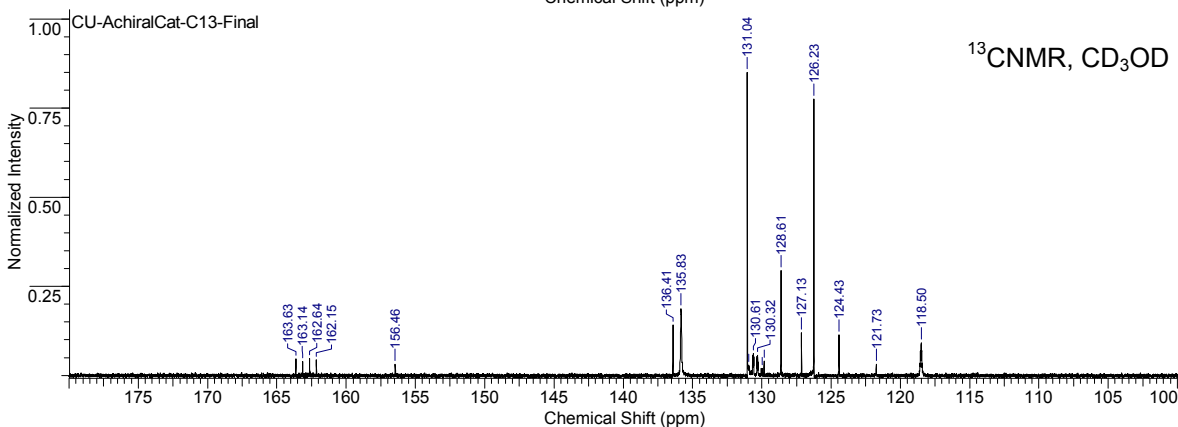

## Preparation of Guanidinium Catalyst 2

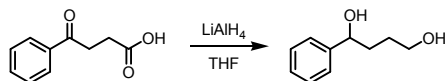

**Reduction.** LiAlH<sub>4</sub> (3.036 g, 80.0 mmol, 4.0 eq) was suspended in 40 mL of THF, and the mixture was cooled to 0 °C. Benzoylpropionic acid (3.5638 g, 20.0 mmol, 1.0 eq) in 50 mL of THF was added dropwise. The reaction mixture was stirred overnight, allowing to warm to room temperature. After 24 h, the reaction mixture was cooled to 0 °C and quenched by successive dropwise addition of 3 mL H<sub>2</sub>O, 3 mL 15% NaOH (aq), and 9 mL H<sub>2</sub>O. After stirring at room temperature for 1 h, MgSO<sub>4</sub> was added, and the mixture was filtered through a plug of celite (washing with THF). The filtrate was concentrated under reduced pressure to give a clear oil that solidified upon standing. 2.77 g of a white solid (83% yield) was isolated and carried forward without purification.

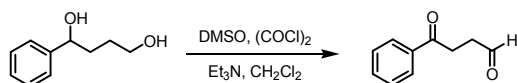

**Swern Oxidation.** Oxalyl chloride (6.44 mL, 73.81 mmol, 4.0 eq) was added dropwise to a stirred solution of DMSO (7.79 mL, 110.72 mmol, 6.0 eq) in 200 mL of CH<sub>2</sub>Cl<sub>2</sub> cooled to -78 °C. After stirring at -78 °C for 10 min, the diol (3.0672 g, 18.45 mmol, 1.0 eq) in 100 mL of CH<sub>2</sub>Cl<sub>2</sub> was added dropwise. Stirring was continued at -78 °C for 10 min. Et<sub>3</sub>N (25.7 mL, 184.53 mmol, 10.0 eq) was added, and the reaction mixture was allowed to warm to room temperature. The reaction solution was diluted with 400 mL of Et<sub>2</sub>O and poured into a separatory funnel. The organic phase was washed successively with 3 x 200 mL of water and 200 mL of brine, dried over Na<sub>2</sub>SO<sub>4</sub>, and concentrated under reduced pressure. The residue was purified by flash chromatography, eluting with a solvent gradient of 4:1 to 2:1 hexane/EtOAc, to yield 2.6753 g of a clear oil (89% yield). <sup>1</sup>H NMR (500 MHz, CDCl<sub>3</sub>): δ 9.91 (1H, s), 7.99 (2H, d, J = 8.2 Hz), 7.57 (1H, t, J = 7.6 Hz), 7.48 (2H, t, J = 7.9 Hz), 3.33 (2H, t, J = 6.4 Hz), 2.94 (2H, t, J = 6.2 Hz); <sup>13</sup>C {<sup>1</sup>H } NMR (100 MHz, CDCl<sub>3</sub>): δ 200.8, 197.9, 136.6, 133.5, 128.8, 128.2, 37.8, 31.2.

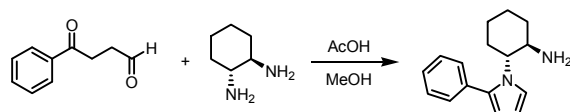

**Paal-Knorr Pyrrole Synthesis.** (R,R)-1,2-trans-diaminocyclohexane<sup>1</sup> (2.2603 g, 19.79 mmol, 1.2 eq) was added to a solution of the keto-aldehyde (2.6753 g, 16.49 mmol, 1.0 eq) in 80 mL of MeOH. The reaction flask was sealed with a rubber septum, evacuated, and back-filled with N<sub>2</sub> three times. Acetic acid (1.133 mL, 19.79 mmol, 1.2 eq) was added, and the reaction was stirred at 50 °C for 14 h. The reaction mixture was cooled to room temperature and poured into 400 mL of 15% NaOH (aq). The product was extracted with 4 x 200 mL of CH<sub>2</sub>Cl<sub>2</sub>, and the combined organic phases were dried over Na<sub>2</sub>SO<sub>4</sub> and concentrated. The residue was purified by flash chromatography, eluting with 5% MeOH in CH<sub>2</sub>Cl<sub>2</sub> to yield 2.1128 g of a pale brown oil (53% yield). <sup>1</sup>H NMR (500 MHz, CDCl<sub>3</sub>): δ 7.30–7.45 (5H, m), 6.88 (1H, m), 6.31 (1H, m), 6.17 (1H,

m), 3.72 (1H, m), 2.95 (1H, dt,  $J = 4.1, 10.5$  Hz), 2.08 (1H, br d,  $J = 13.3$  Hz), 1.97 (1H, br d,  $J = 11.9$  Hz), 1.82 (1H, br d,  $J = 13.3$  Hz), 1.68–1.75 (1H, m), 1.25–1.42 (2H, m), 1.11 (1H, m),  $^{13}\text{C}\{^1\text{H}\}$ NMR (125 MHz,  $\text{CDCl}_3$ ):  $\delta$ 135.9, 133.8, 129.5, 128.6, 127.0, 117.5, 109.1, 108.3, 63.0, 56.5, 34.8, 33.9, 25.8, 25.1.

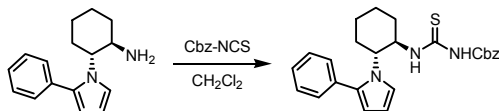

**Thiourea Formation.** The amine (1.0564 g, 4.40 mmol, 1.0 eq) was dissolved in 50 mL of  $\text{CH}_2\text{Cl}_2$ .  $\text{Cbz-NCS}^2$  (~70 wt%, 1.215g, 4.40 mmol, 1.0 eq) was added dropwise at ambient temperature. After stirring for 15 min, the solvent was evaporated under reduced pressure. The oily residue was washed with 3 x 5 mL portions of hexanes to remove trace amounts of  $\text{Cbz-NCS}$ . Drying under vacuum gave in quantitative yield a light brown oil that was carried forward without purification.  $^1\text{H}$ NMR (400 MHz,  $\text{CDCl}_3$ ):  $\delta$ 9.32 (1H, d,  $J = 8.8$  Hz), 7.78 (1H, s), 7.28–7.43 (10H, m), 6.94 (1H, m), 6.23 (1H, m), 6.09 (1H, m), 5.12 (2H, s), 4.72 (1H, m), 4.02 (1H, dt,  $J = 3.9, 11.3$  Hz), 2.38 (1H, br d,  $J = 12.4$  Hz), 2.16 (1H, br d,  $J = 13.5$  Hz), 1.84–1.74 (3H, m), 1.32–1.48 (1H, m), 1.13–1.30 (2H, m),  $^{13}\text{C}\{^1\text{H}\}$ NMR (100 MHz,  $\text{CDCl}_3$ ):  $\delta$ 135.9, 133.8, 129.5, 128.6, 127.0, 117.5, 109.1, 108.3, 63.0, 56.5, 34.8, 33.9, 25.8, 25.1.

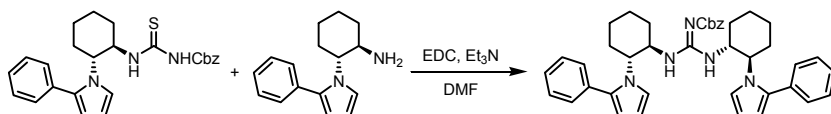

**Guanidine Formation.** The amine and thiourea were dissolved in 50 mL of DMF.  $\text{Et}_3\text{N}$  (3.07 mL, 22.0 mmol, 5.0 eq) and EDC (1.687 g, 8.80 mmol, 2.0 eq) were added, and the reaction was stirred at  $50^\circ\text{C}$ . After 14 h, the reaction mixture was diluted with 250 mL of  $\text{EtOAc}$  and successively washed with 3 x 200mL 1M  $\text{HCl}$  (aq), sat  $\text{NaHCO}_3$  (aq), and brine. The organic phase was dried over  $\text{Na}_2\text{SO}_4$  and concentrated to yield 2.5724 g of a pale brown solid (91% yield), which was carried forward without purification.

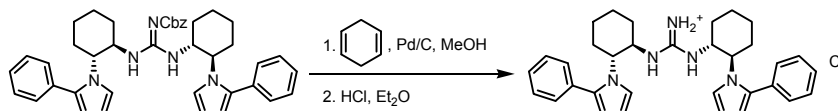

**Transfer Hydrogenolysis.** The  $\text{Cbz}$ -protected guanidine (2.5724 g, 4.02 mmol, 1.0 eq) was suspended in 160 mL of  $\text{MeOH}$ . The reaction flask was evacuated and back-filled with  $\text{N}_2$  three times, and 10 wt%  $\text{Pd/C}$  (5.1448 g, 200 wt% relative to substrate) was added. The reaction flask was placed in an ambient temperature water bath, and 1,4-cyclohexadiene (7.6 mL, 80.41 mmol, 20.0 eq) was added dropwise. The reaction was stirred at room temperature and monitored by TLC (after the reaction was complete only baseline material remained in 1:1 hexanes/ $\text{EtOAc}$ ). After 24 h, the reaction mixture was filtered through a celite plug (washing with  $\text{MeOH}$ ), and the filtrate was cooled to  $-78^\circ\text{C}$ . 1M  $\text{HCl}$  in  $\text{Et}_2\text{O}$  (10 mL, 10.0 mmol, 2.5 eq) was added dropwise with stirring. The solution was allowed to warm to room temperature, and the solvent and excess  $\text{HCl}$  were removed under reduced pressure to yield 1.7317 g of pale red solid (79% yield).

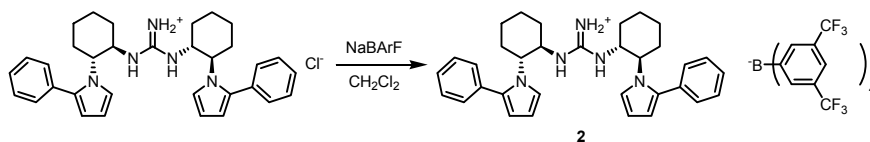

**Counterion Metathesis.** The guanidinium chloride (1.7317 g, 3.194 mmol, 1.0 eq) was dissolved in 60 mL of  $\text{CH}_2\text{Cl}_2$ .  $\text{NaBARF}^3$  (3.194 g, 3.194 mmol, 1.0 eq) was added, and the reaction was stirred at room temperature for 15 min during which time sodium chloride precipitated from solution. The mixture was filtered through a plug of celite (washing with  $\text{CH}_2\text{Cl}_2$ ), and the filtrate was concentrated under reduced pressure. The residue was purified by flash chromatography, eluting with 4% MeOH in  $\text{CH}_2\text{Cl}_2$ , to yield 3.559 g of an off-white solid (81% yield).  $[\alpha]_D^{27} +33.7^\circ$  (c = 1.0,  $\text{CHCl}_3$ );  $^1\text{H NMR}$  (500 MHz,  $\text{CDCl}_3$ ):  $\delta$  7.72 (8H, s), 7.53 (4H, s), 7.30 (4H, t, J = 7.3 Hz), 7.25 (2H, t, 6.8 Hz), 7.00 (4H, d, J = 7.3 Hz), 6.86 (2H, s), 6.35 (2H, t, J = 2.9 Hz), 6.06 (2H, br s), 4.15 (2H, br s), 3.91 (2H, t, J = 9.5 Hz), 3.55 (2H, br s), 3.00 (2H, br m), 2.35 (2H, br d, J = 13.2 Hz), 1.99–1.84 (8H, m), 2.37 (4H, m), 1.07 (2H, br q, J = 12.0 Hz);  $^{13}\text{C}\{^1\text{H}\}$  NMR (100 MHz,  $\text{CDCl}_3$ ):  $\delta$  161.8 (q,  $^1J_{\text{B-C}} = 49.3$  Hz), 154.6, 136.9, 135.0, 132.2, 129.2, 129.0 (q,  $^2J_{\text{C-F}} = 30.0$  Hz), 128.7, 128.3, 124.7 (q,  $^1J_{\text{C-F}} = 270.5$  Hz), 117.6, 115.8, 112.4, 110.5, 60.5, 59.2, 33.6, 31.6, 24.6, 24.4;  $^{11}\text{B NMR}$  (96 MHz,  $\text{CDCl}_3$ ):  $\delta$  -6.56 (s);  $^{19}\text{F NMR}$  (282 MHz,  $\text{CDCl}_3$ ):  $\delta$  -62.67 (s); HRMS (ESI)  $[\text{M-BArF}]^+$  calculated for  $\text{C}_{65}\text{H}_{52}\text{BF}_{24}\text{N}_5$ : 506.32782, found: 212.328528; FTIR (neat,  $\text{cm}^{-1}$ ): 3379 (br), 2948 (w), 2869 (w), 1617 (m), 1355 (s), 1278 (s), 1125 (br).

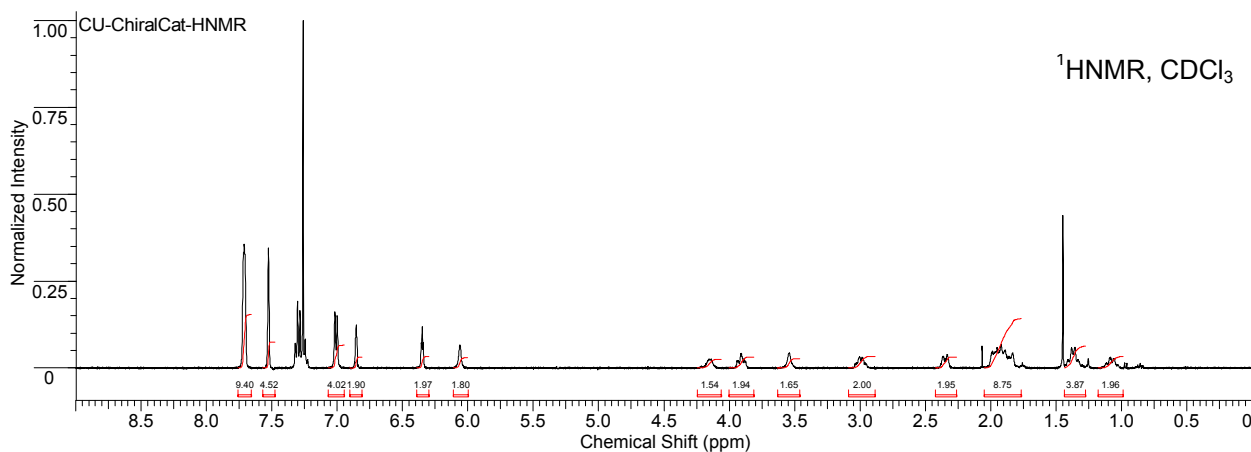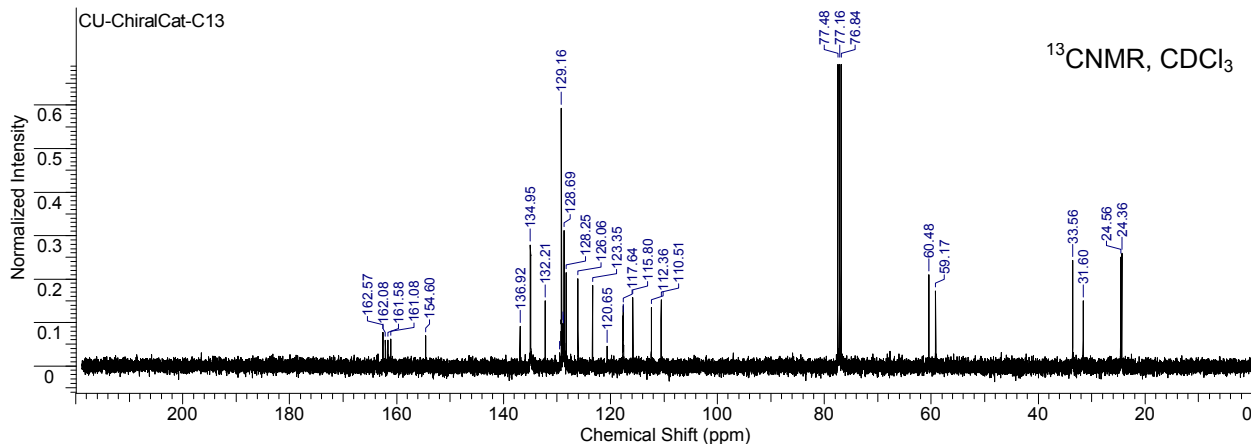



## 4. General Procedure and Data for the Achiral Claisen Rearrangement

### General Procedure for the achiral Claisen rearrangement

A stock solution of the Claisen substrate (0.2 M) and *p*-xylene as an internal standard in  $C_6D_6$  was prepared. The initial relative concentration of the substrate to the internal standard was determined by  $^1H$ NMR integration. The stock solution was either added to a vial containing 20 mol% of **1** or added to a vial without **1**, and stirred at the indicated temperature. After the specified amount of time, the crude reaction mixture was analyzed by  $^1H$ NMR.

### Data for the achiral Claisen rearrangement

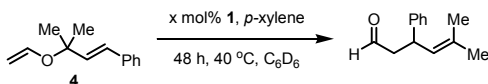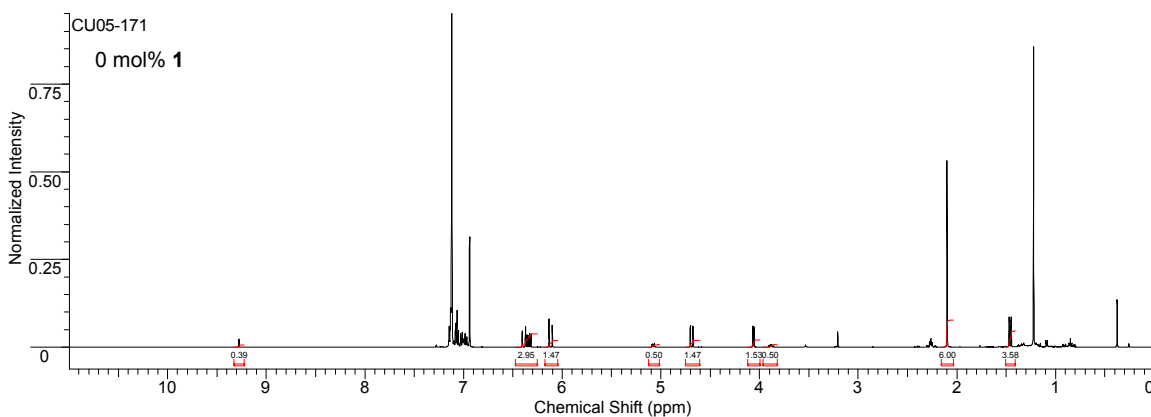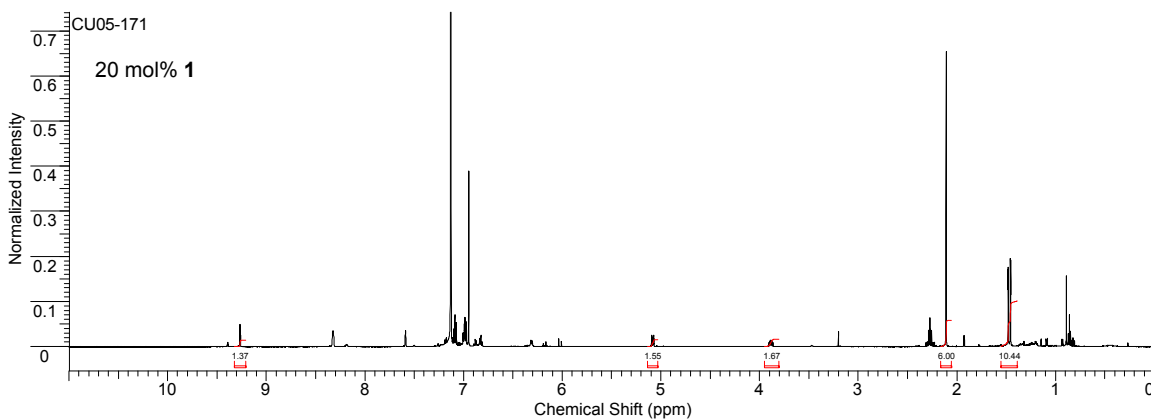

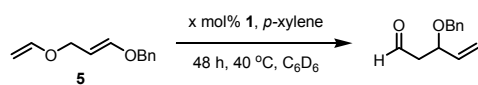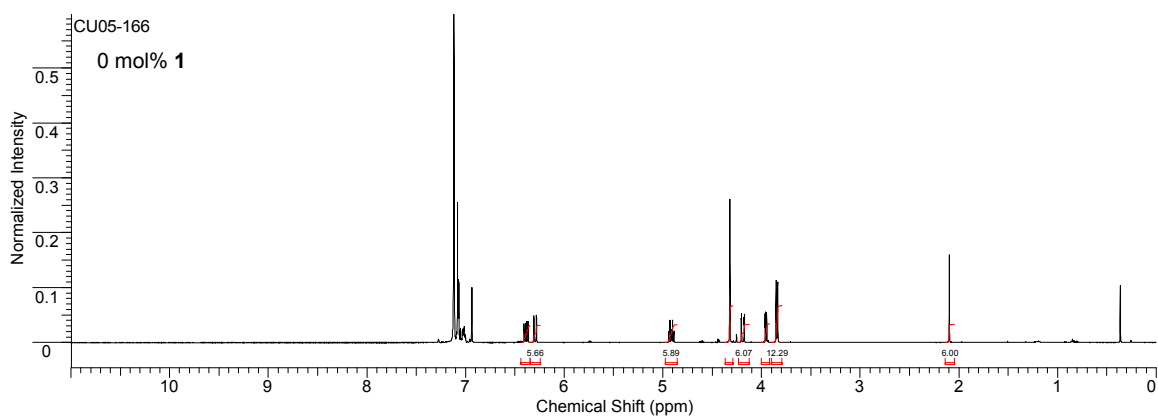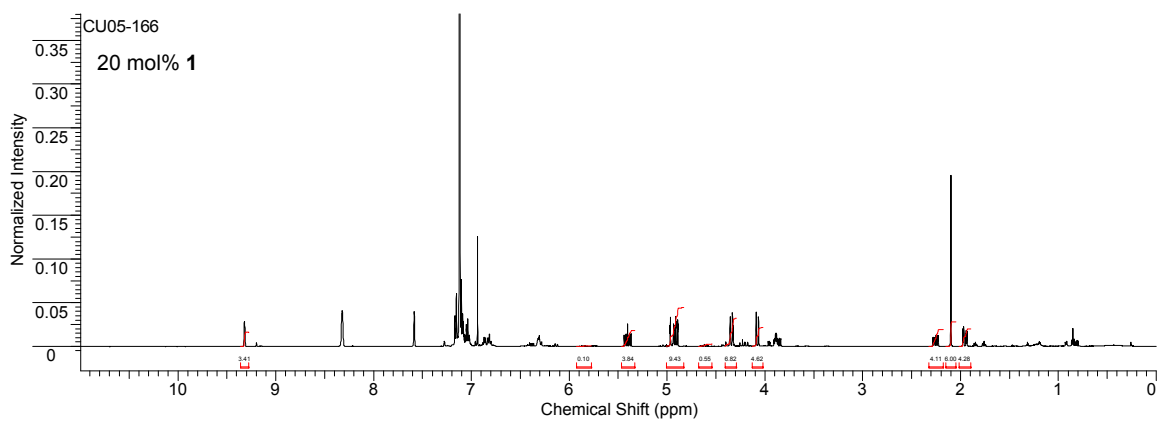

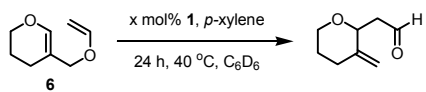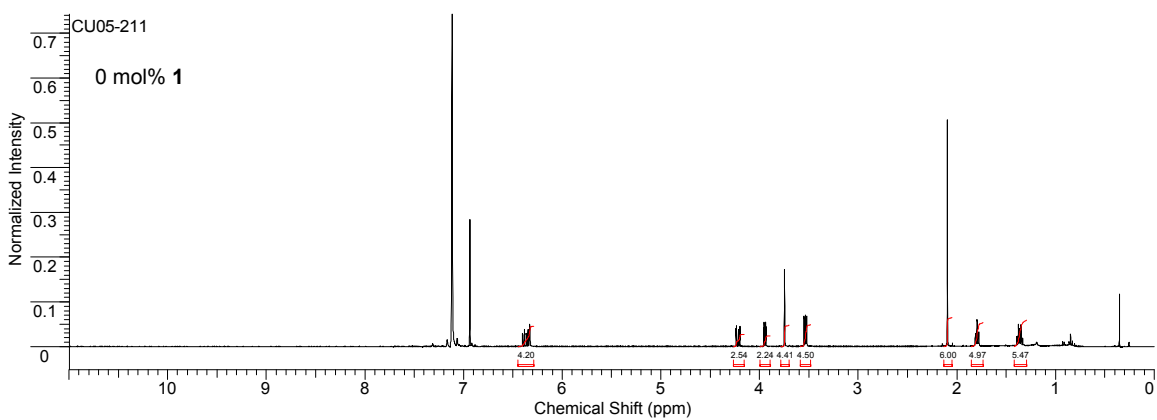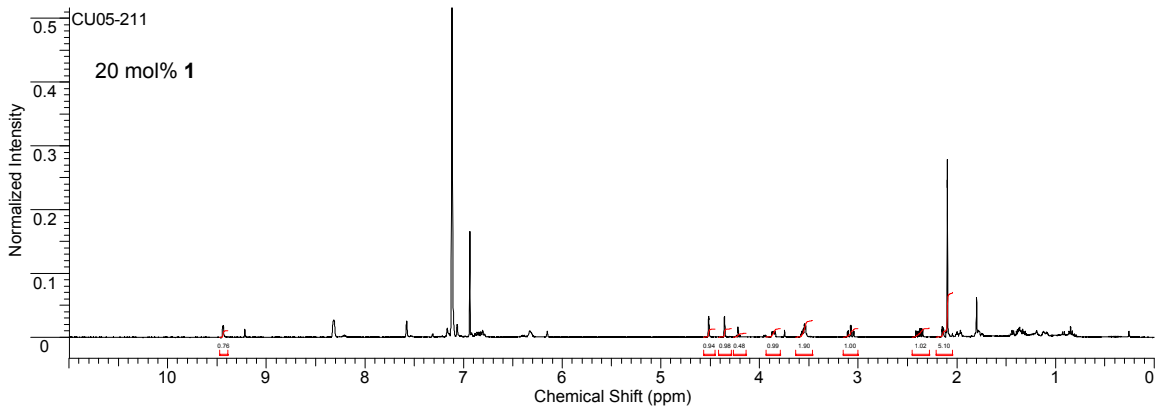

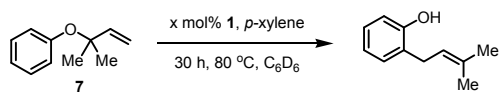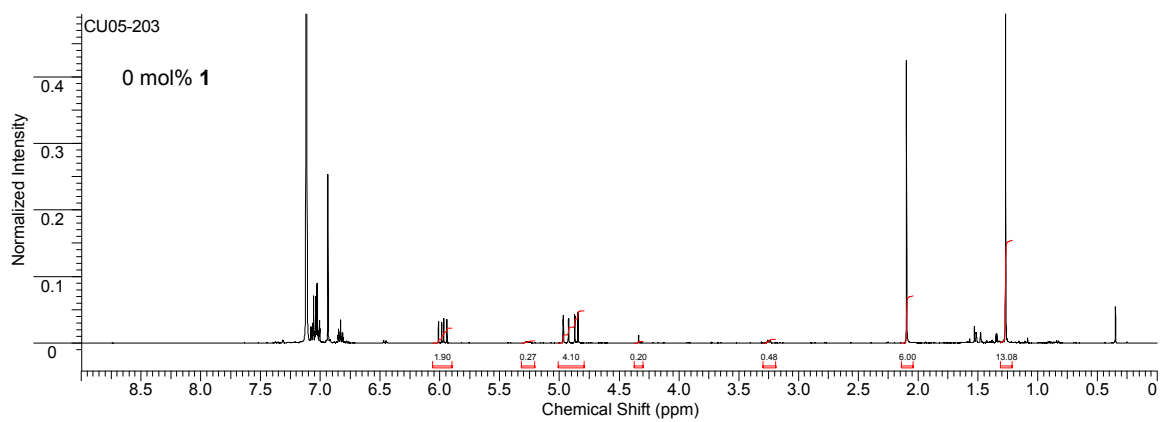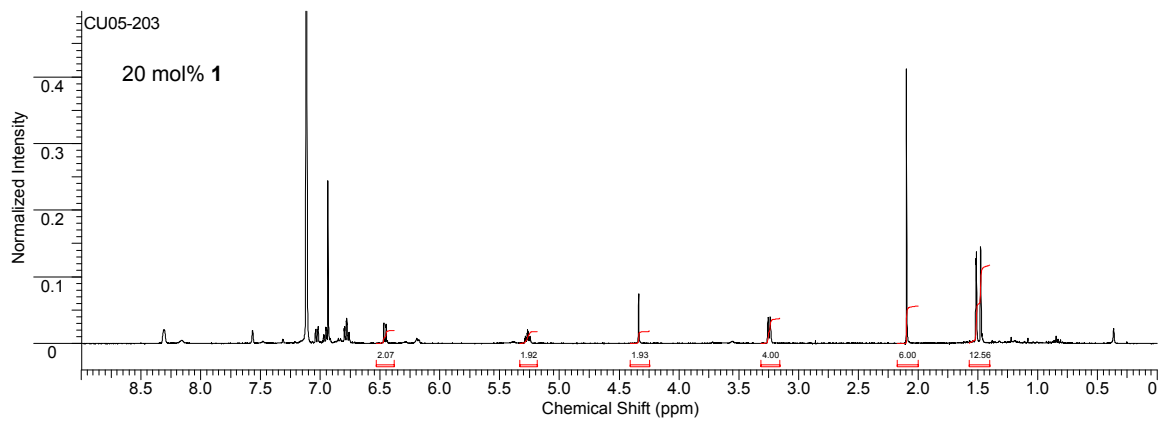

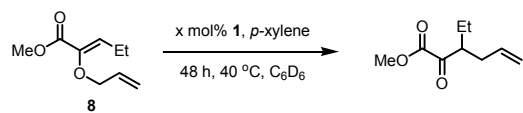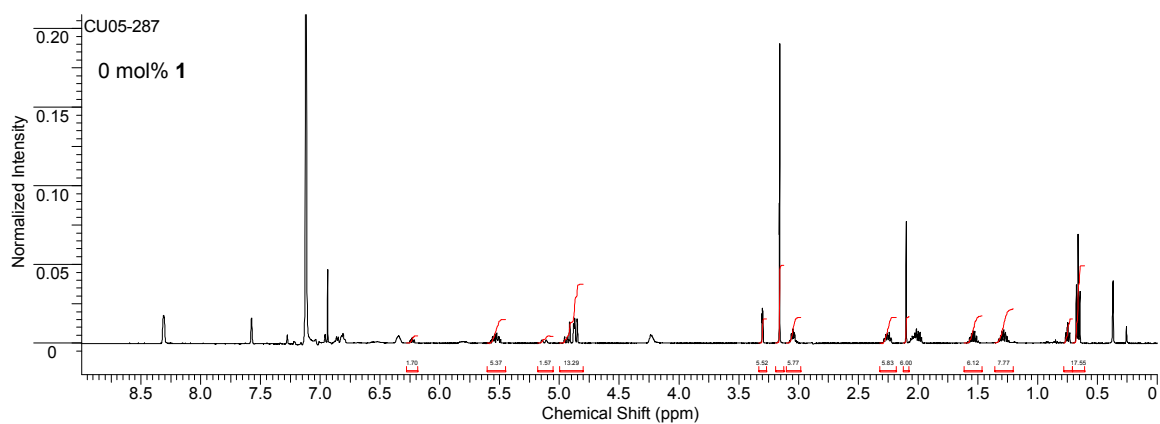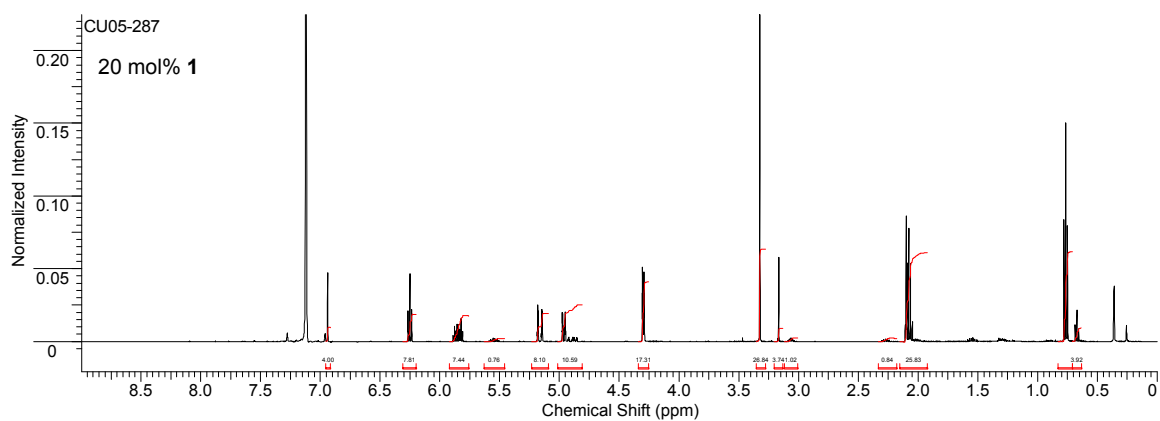

## 5. Substrate Preparation and Characterization Data

### General Procedure for Substrate Preparation

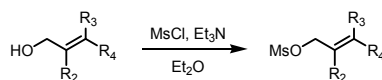

Allyl mesylates were generally prepared by dropwise addition of 1.0 eq of MsCl to a solution of 1.0 eq of the corresponding allyl alcohol and 1.0 eq of Et<sub>3</sub>N in Et<sub>2</sub>O (1.0 M reaction concentration) at -78 °C. Following addition, the reaction was warmed to 0 °C in an ice bath and stirred at that temperature for 15 min. The resulting slurry was filtered through a glass fritted funnel. Some of the allyl mesylates (crotyl, prenyl, and geranyl mesylate in particular) were found to decompose rapidly at room temperature when concentrated. These compounds should be handled and stored as dilute solutions in Et<sub>2</sub>O at -78 °C. These allyl mesylate stock solutions could be directly added to the enolate solutions in the subsequent O-alkylation step without need for solvent removal or swapping.

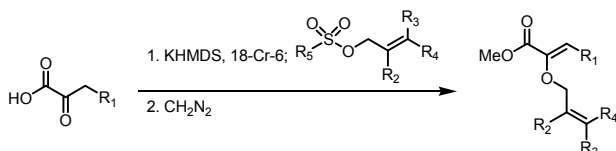

18-Crown-6 (2.4 eq) was dissolved in THF (10 mL/mmol of  $\alpha$ -ketoacid). The solution was cooled to -78 °C, and KHMDS solution (2.4 eq, 0.5 M in toluene) and  $\alpha$ -ketoacid (1.0 eq) were successively added.  $\alpha$ -ketoacids that were solids were added as a solution in THF (5 mL/mmol of  $\alpha$ -ketoacid). After stirring at -78 °C for 1 h, the allyl sulfonate (1.4 eq) was added neat or as a stock solution in Et<sub>2</sub>O. Stirring was continued at -78 °C for 2 h. The reaction mixture was quenched by dropwise addition of 1 M NaOH (aq) and allowed to warm to room temperature. The mixture was diluted with Et<sub>2</sub>O and extracted with 4 x 1 M NaOH (aq). The combined aqueous phases were acidified to pH < 2.0 with 1 M HCl (aq) with cooling in an ice bath. The aqueous phase was extracted with 5 x CH<sub>2</sub>Cl<sub>2</sub>, and the combined organic phases were dried over Na<sub>2</sub>SO<sub>4</sub>. The solvent was concentrated under reduced pressure, and the residue was taken up in Et<sub>2</sub>O (20 mL/mmol of  $\alpha$ -ketoacid). CH<sub>2</sub>N<sub>2</sub><sup>4</sup> was added as a solution in Et<sub>2</sub>O (approximately 1 M) until the yellow color persisted. N<sub>2</sub> was bubbled through the solution until the yellow color disappeared, and the remainder of the solvent was evaporated under reduced pressure. The product was purified by flash chromatography. Typically, CH<sub>2</sub>Cl<sub>2</sub>/hexanes and Et<sub>2</sub>O/pentane solvent systems were effective in separating the desired products from any reaction byproducts.

### Substrate Characterization Data

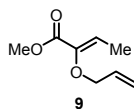

2-ketobutyric acid (102.1 mg, 1.0 mmol) was reacted with allyl tosylate (252  $\mu$ L, 1.4 mmol) to afford 86.1 mg of the desired methyl ester as a clear oil (55% yield). <sup>1</sup>HNMR (400 MHz, CDCl<sub>3</sub>):  $\delta$ 6.37 (1H, q, J = 7.1 Hz), 6.00 (H, ddt, J = 10.4, 17.0, 6.0 Hz), 5.33 (1H, d, J = 17.2

Hz), 5.22 (1H, d, J = 10.6 Hz), 4.33 (2H, d, J = 5.9 Hz), 3.77 (3H, s), 1.78 (3H, d, J = 7.0 Hz);  $^{13}\text{C}\{^1\text{H}\}$ NMR (100 MHz,  $\text{CDCl}_3$ ):  $\delta$ 164.5, 145.7, 133.9, 124.9, 118.3, 73.2, 52.0, 11.5; HRMS (ESI)  $[\text{M}+\text{Na}]^+$  calculated for  $\text{C}_8\text{H}_{12}\text{O}_3$ : 179.06787, found: 179.06822; FTIR (neat,  $\text{cm}^{-1}$ ): 2953 (w), 1726 (s), 1651 (m), 1438 (w), 1323 (m), 1267 (s), 1132 (m), 1080 (m), 1033 (m), 774 (w).

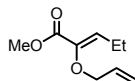

2-oxovaleric acid (105  $\mu\text{L}$ , 1.0 mmol) was reacted with allyl tosylate (252  $\mu\text{L}$ , 1.4 mmol) to afford 159.1 mg of the desired methyl ester as a clear oil (93% yield).  $^1\text{H}$ NMR (500 MHz,  $\text{CDCl}_3$ ):  $\delta$ 6.29 (1H, t, J = 7.6 Hz), 5.99 (1H, ddt, J = 17.1, 10.3, 5.9 Hz), 5.32 (1H, d, J = 17.1 Hz), 5.22 (1H, d, J = 10.3 Hz), 4.32 (2H, d, J = 5.9 Hz), 3.77 (3H, s), 2.25 (2H, apparent p, J = 7.6 Hz), 1.03 (3H, t, J = 7.6 Hz);  $^{13}\text{C}\{^1\text{H}\}$ NMR (100 MHz,  $\text{CDCl}_3$ ):  $\delta$ 164.7, 144.1, 133.9, 131.6, 118.3, 73.4, 52.0, 19.3, 13.4; HRMS (ESI)  $[\text{M}+\text{Na}]^+$  calculated for  $\text{C}_9\text{H}_{14}\text{O}_3$ : 193.08352, found: 193.08276; FTIR (neat,  $\text{cm}^{-1}$ ): 2969 (w), 2953 (w), 1726 (s), 1650 (w), 1368 (w), 1302 (m), 1246 (m), 1144 (m), 1090 (m), 996 (w).

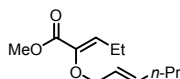

2-oxovaleric acid acid (105  $\mu\text{L}$ , 1.0 mmol) was reacted with 2-hexenyl mesylate (1.4 mmol) to afford 99.9 mg of the desired methyl ester as a clear oil (47% yield).  $^1\text{H}$ NMR (400 MHz,  $\text{CDCl}_3$ ):  $\delta$ 6.26 (1H, t, J = 7.7 Hz), 5.67 (2H, m), 4.25 (2H, d, J = 6.6 Hz), 3.75 (3H, s), 2.23 (2H, apparent p, J = 7.6 Hz), 2.02 (2H, apparent q, J = 6.7 Hz), 1.39 (2H, apparent sextet, J = 7.3 Hz), 1.01 (3H, t, J = 7.5 Hz), 0.89 (3H, t, J = 7.3 Hz);  $^{13}\text{C}\{^1\text{H}\}$ NMR (100 MHz,  $\text{CDCl}_3$ ):  $\delta$ 164.8, 144.1, 136.3, 131.6, 125.5, 73.3, 52.0, 34.5, 22.2, 19.4, 13.8, 13.4; HRMS (ESI)  $[\text{M}+\text{Na}]^+$  calculated for  $\text{C}_{12}\text{H}_{20}\text{O}_3$ : 235.13047, found: 235.12964; FTIR (neat,  $\text{cm}^{-1}$ ): 2961 (m), 2934 (w), 2874 (w), 1728 (s), 1649 (w), 1436 (w), 1300 (m), 1273 (m), 1245 (m), 1144 (m), 1086 (m), 971 (w).

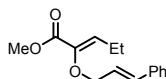

2-oxovaleric acid (105  $\mu\text{L}$ , 1.0 mmol) was reacted with cinnamyl mesylate (1.4 mmol) to afford 127.6 mg of the desired methyl ester as a clear oil (56% yield).  $^1\text{H}$ NMR (500 MHz,  $\text{CDCl}_3$ ):  $\delta$ 7.40 (2H, d, J = 7.6 Hz), 7.32 (2H, t, J = 7.6 Hz), 7.25 (1H, t, J = 7.6 Hz), 6.64 (1H, d, J = 16.0 Hz), 6.30-6.39 (2H, m), 4.50 (2H, d, J = 6.4 Hz), 3.79 (3H, s), 2.29 (2H, p, J = 7.6 Hz), 1.03 (3H, t, J = 7.6 Hz). ;  $^{13}\text{C}\{^1\text{H}\}$  NMR (125 MHz,  $\text{CDCl}_3$ ):  $\delta$ 164.7, 144.1, 136.6, 133.7, 131.8, 128.7, 128.0, 126.7, 124.9, 73.1, 52.0, 19.4, 13.4; LRMS (ESI): 269.1 (100%)  $[\text{M}+\text{Na}]^+$ ; FTIR (neat,  $\text{cm}^{-1}$ ): 2968 (m), 2874 (w), 1724 (s), 1651 (m), 1435 (m), 1343 (m), 1301 (m), 1273 (m), 1246 (s), 1145 (s), 1081 (m), 967 (m), 777 (m), 746 (m), 692 (m).

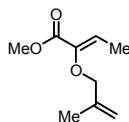

2-ketobutyric acid (102.1 mg, 1.0 mmol) was reacted with 2-methylallyl mesylate (1.4 mmol) to afford 67.2 mg of the desired methyl ester as a clear oil (39% yield).  $^1\text{H}$ NMR (500 MHz,  $\text{CDCl}_3$ ):  $\delta$ 6.33 (1H, q, J = 7.2 Hz), 5.04 (1H, s), 4.93 (1H, s), 4.22 (2H, s), 3.76 (3H, s), 1.83 (3H,

s), (3H, d, J = 6.9 Hz).  $^{13}\text{C}$ NMR (125 MHz,  $\text{CDCl}_3$ ):  $\delta$ 164.5, 145.8, 141.6, 124.3, 113.5, 76.0, 51.9, 19.8, 11.4. HRMS (ESI)  $[\text{M}+\text{Na}]^+$  calculated for  $\text{C}_9\text{H}_{14}\text{O}_3$ : 193.08352, found: 193.08410; FTIR (neat,  $\text{cm}^{-1}$ ): 2952 (w), 2919 (w), 1727 (s), 1655 (m), 1438 (w), 1325 (m), 1266 (s), 1134 (s), 1084 (m), 1033 (w), 772 (w).

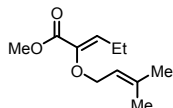

2-oxovaleric acid (105  $\mu\text{L}$ , 1.0 mmol) was reacted with prenyl mesylate (1.4 mmol) to afford 49.2 mg of the desired methyl ester as a clear oil (25% yield).  $^1\text{H}$ NMR (500 MHz,  $\text{CDCl}_3$ ):  $\delta$ 6.25 (1H, t, J = 7.8 Hz), 5.42 (1H, t, J = 7.3 Hz), 4.31 (2H, d, 7.3 Hz), 3.76 (3H, s), 2.24 (2H, p, J = 7.6 Hz), 1.75 (3H, s), 1.68 (3H, s), 1.01 (3H, t, 7.6 Hz);  $^{13}\text{C}\{^1\text{H}\}$ NMR (125 MHz,  $\text{CDCl}_3$ ):  $\delta$ 164.9, 144.2, 138.8, 131.5, 120.2, 68.7, 51.9, 25.9, 19.3, 18.1, 13.4; HRMS (ESI)  $[\text{M}+\text{Na}]^+$  calculated for  $\text{C}_{11}\text{H}_{18}\text{O}_3$ : 221.11482, found: 221.11561; FTIR (neat,  $\text{cm}^{-1}$ ): 2968 (m), 1727 (s), 1649 (w), 1436 (w), 1299 (m), 1272 (m), 1245 (m), 1144 (m), 1087 (m).

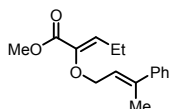

2-oxovaleric acid (105  $\mu\text{L}$ , 1.0 mmol) was reacted with 3-phenyl-2-butenyl mesylate (1.4 mmol) to afford 62.9 mg of the desired methyl ester as a clear oil (24% yield).  $^1\text{H}$ NMR (500 MHz,  $\text{CDCl}_3$ ):  $\delta$ 7.41 (2H, d, J = 6.9 Hz), 7.33 (2H, t, 7.6 Hz), 7.27 (1H, t, 7.1 Hz), 6.31 (1H, t, J = 7.6 Hz), 6.00 (1H, t, J = 7.3 Hz), 4.56 (2H, d, J = 6.9 Hz), 3.79 (3H, s), 2.29 (2H, p, J = 7.6 Hz), 2.09 (3H, s), 1.03 (3H, t, 7.6 Hz);  $^{13}\text{C}\{^1\text{H}\}$ NMR (125 MHz,  $\text{CDCl}_3$ ):  $\delta$ 164.8, 144.2, 142.9, 138.8, 131.8, 128.4, 127.3, 126.0, 123.1, 69.1, 52.0, 19.4, 16.3, 13.4; HRMS (ESI)  $[\text{M}+\text{Na}]^+$  calculated for  $\text{C}_{16}\text{H}_{20}\text{O}_3$ : 283.13047, found: 283.13189; FTIR (neat,  $\text{cm}^{-1}$ ): 2968 (m), 2874 (w), 1723 (s), 1648 (m), 1436 (m), 1346 (m), 1299 (m), 1272 (m), 1244 (s), 1144 (s), 1085 (s), 1037 (m), 758 (m), 695 (m).

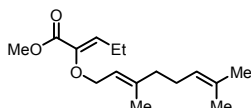

2-oxovaleric acid (105  $\mu\text{L}$ , 1.0 mmol) was reacted with geranyl mesylate (1.4 mmol) to afford 83.7 mg of the desired methyl ester as a clear oil (31% yield).  $^1\text{H}$ NMR (500 MHz,  $\text{CDCl}_3$ ):  $\delta$ 6.26 (1H, t, J = 7.6 Hz), 5.42 (1H, t, J = 7.2 Hz), 5.09 (1H, t, J = 6.6 Hz), 4.34 (2H, d, J = 7.1 Hz), 3.76 (3H, s), 2.25 (2H, apparent p, J = 7.6 Hz), 2.02-2.11 (4H, m), 1.67 (6H, s), 1.60 (3H, s), 1.02 (3H, t, J = 7.6 Hz);  $^{13}\text{C}$ NMR (125 MHz,  $\text{CDCl}_3$ ):  $\delta$ 164.9, 144.2, 142.0, 131.8, 131.5, 124.0, 119.8, 68.7, 51.9, 39.7, 26.5, 25.8, 19.4, 17.8, 16.5, 13.4; HRMS  $[\text{M}+\text{Na}]^+$  calculated for  $\text{C}_{16}\text{H}_{26}\text{O}_3$ : 289.17742, found: 289.17837; FTIR (neat,  $\text{cm}^{-1}$ ): 2968 (m), 2931 (m), 2877 (w), 1727 (s), 1649 (w), 1436 (m), 1299 (m), 1279 (m), 1244 (s), 1144 (s), 1086 (s), 1039 (w).



## 6. General Procedure for the Asymmetric Claisen Rearrangement and Product Characterization

### General Procedure for the Asymmetric Claisen Rearrangement

In a screw-top vial equipped with a magnetic stir bar, 0.1 mmol of the allyl vinyl ether substrate was dissolved in 2.0 mL of hexanes. 0.02 mmol of **2** was added as a solid, and the vial was sealed under air. The reaction was allowed to stir at the specified temperature and monitored by TLC. After the indicated time, the reaction mixture was concentrated to 0.5 mL, and loaded directly onto a silica gel column with 1:1 CH<sub>2</sub>Cl<sub>2</sub>/hexanes.

### Product Characterization

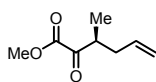

According to the general procedure, the substrate (15.6 mg, 0.1 mmol) and catalyst (27.4 mg, 0.02 mmol) in 2.0 mL of hexanes were stirred at 22 °C for 14 days. After column chromatography (eluting with 1:1 hexanes/CH<sub>2</sub>Cl<sub>2</sub>), 23.5 mg of product (80% yield) was obtained. This material was determined to be 92% ee by chiral HPLC analysis (OD-H, 0.1% IPA in hexanes, 1.0 mL/min, 210 nm, *t<sub>r</sub>*(major)= 11.2 min, *t<sub>r</sub>*(minor) = 12.2 min); [ $\alpha$ ]<sub>D</sub><sup>20</sup> +20.6° (c = 0.100, CHCl<sub>3</sub>); <sup>1</sup>HNMR (500 MHz, CDCl<sub>3</sub>): 85.72 (1H, m), 5.06 (2H, m), 3.87 (3H, s), 3.32 (1H, apparent sextet, J = 6.9 Hz), 2.47 (1H, m), 2.17 (1H, m), 1.15 (3H, d, J = 6.9 Hz). <sup>13</sup>C{<sup>1</sup>H}NMR (125 MHz, CDCl<sub>3</sub>): 197.2, 162.1, 134.8, 117.7, 53.0, 41.9, 36.2, 15.1; HRMS (ESI) [M+Na]<sup>+</sup> calculated for C<sub>8</sub>H<sub>12</sub>O<sub>3</sub>: 179.06787, found: 179.06737; FTIR (neat, cm<sup>-1</sup>): 2958 (m), 2921 (m), 1728 (s), 1282 (m), 1038 (m).

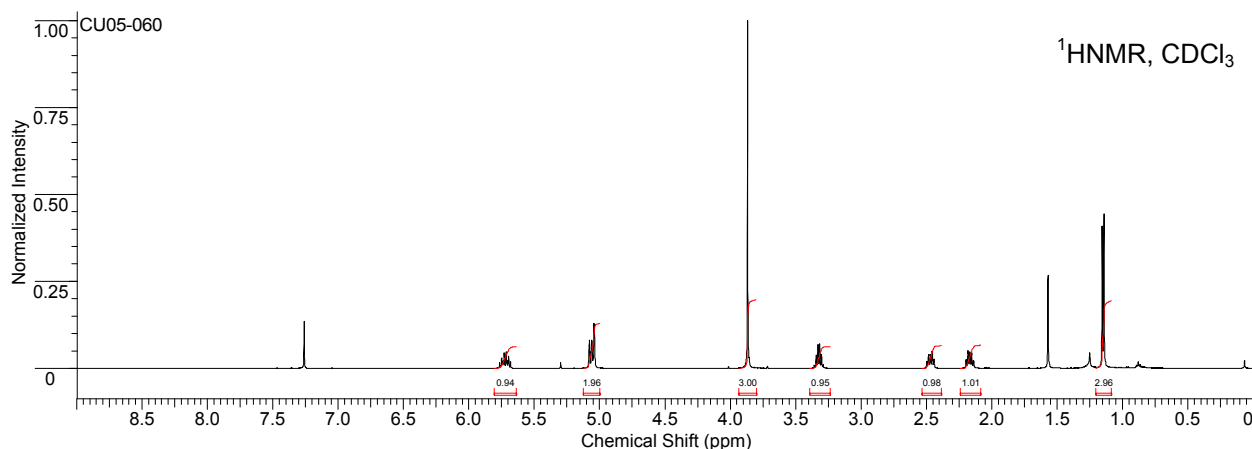

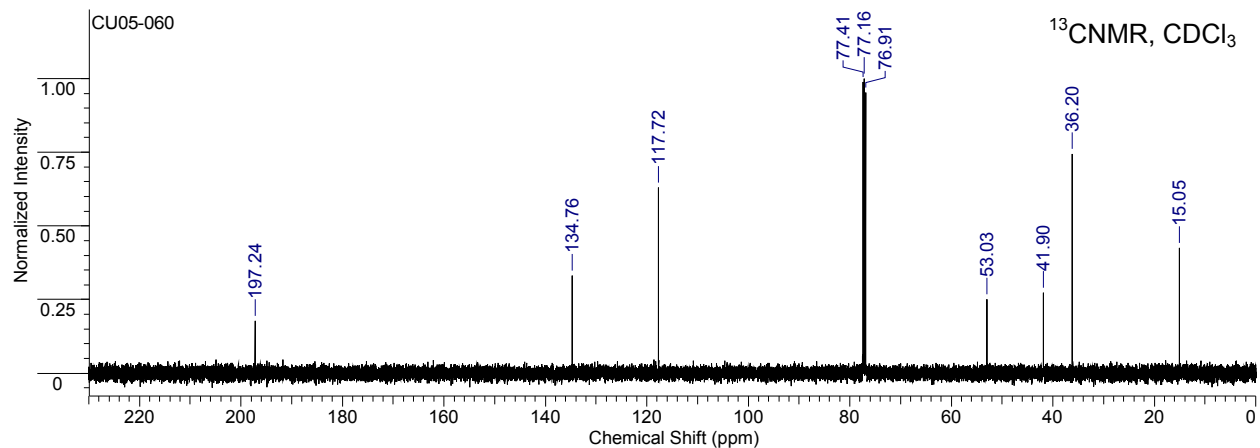

Racemic Sample: HPLC (OD-H, 0.1% IPA in hexanes, 1.0 mL/min, 210 nm)

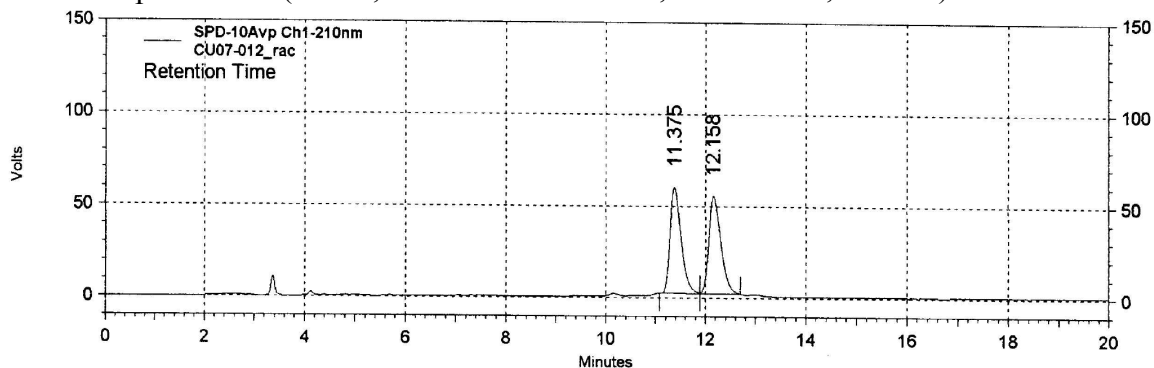

SPD-10Avp  
Ch1-210nm  
Results

| Retention Time | Area   | Area % | Height | Height % |
|----------------|--------|--------|--------|----------|
| 11.375         | 881030 | 49.93  | 57685  | 52.07    |
| 12.158         | 883498 | 50.07  | 53107  | 47.93    |

Enantioselective Sample: HPLC (OD-H, 0.1% IPA in hexanes, 1.0 mL/min, 210 nm) 92% ee

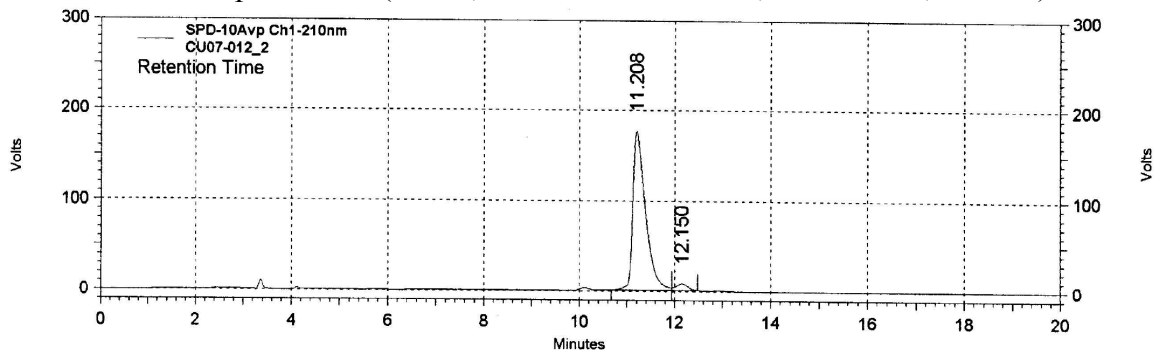

SPD-10Avp  
Ch1-210nm  
Results

| Retention Time | Area    | Area % | Height | Height % |
|----------------|---------|--------|--------|----------|
| 11.208         | 3258801 | 96.05  | 176004 | 95.81    |
| 12.150         | 134027  | 3.95   | 7699   | 4.19     |

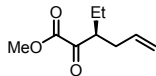

The substrate (17.2 mg, 0.1 mmol) and catalyst (27.4 mg, 0.02 mmol) in 2.0 mL of hexanes were stirred at 22 °C for 9 days. After column chromatography (eluting with 1:1 hexanes/CH<sub>2</sub>Cl<sub>2</sub>), 14.6 mg of product (86% yield) was obtained. This material was determined to be 92% ee by chiral GC analysis ( $\gamma$ -TA, 80 °C,  $t_r$ (major) = 23.3 min,  $t_r$ (minor) = 25.9 min);  $[\alpha]_D^{29}$  -9.1° (c = 0.600, CHCl<sub>3</sub>); <sup>1</sup>HNMR (500 MHz, CDCl<sub>3</sub>):  $\delta$  5.71 (1H, m), 5.05 (1H, d, J = 16.9 Hz), 5.02 (1H, d, J = 7.3 Hz), 3.86 (3H, s), 3.26 (1H, tt, J = 6.0, 7.3 Hz), 2.42 (1H, m), 2.26 (1H, m), 1.73 (1H, m), 1.56 (1H, m), 0.89 (3H, t, J = 7.3 Hz) <sup>13</sup>C{<sup>1</sup>H}NMR (125 MHz, CDCl<sub>3</sub>):  $\delta$  197.3, 162.2, 134.9, 117.5, 53.0, 48.7, 34.3, 23.3, 11.4; HRMS (ESI) [M+Na]<sup>+</sup> calculated for C<sub>9</sub>H<sub>14</sub>O<sub>3</sub>: 193.08352, found: 193.08285; FTIR (neat, cm<sup>-1</sup>): 2968 (m), 1730 (s), 1439 (w), 1288 (m), 1244 (w), 1052 (m), 919 (w).

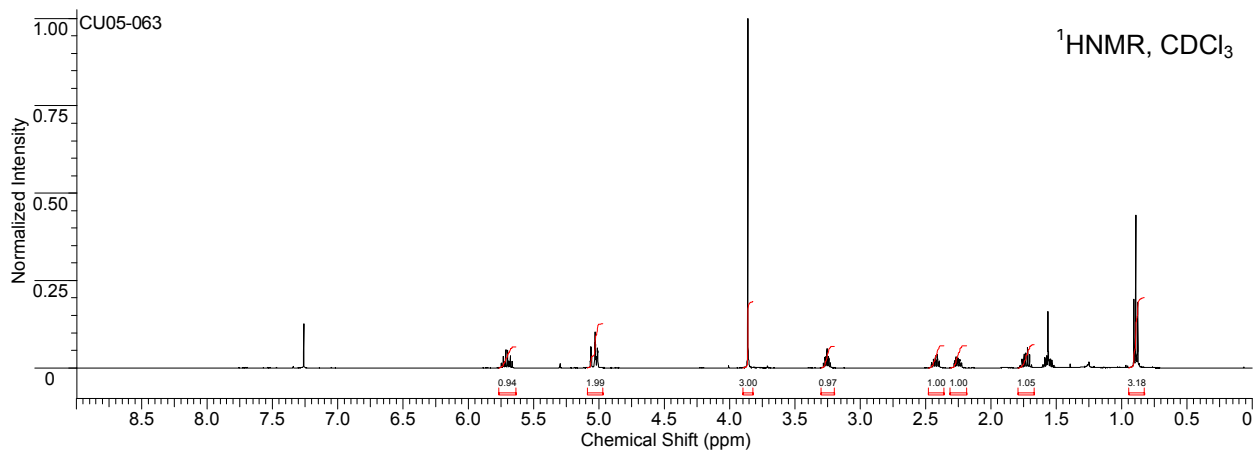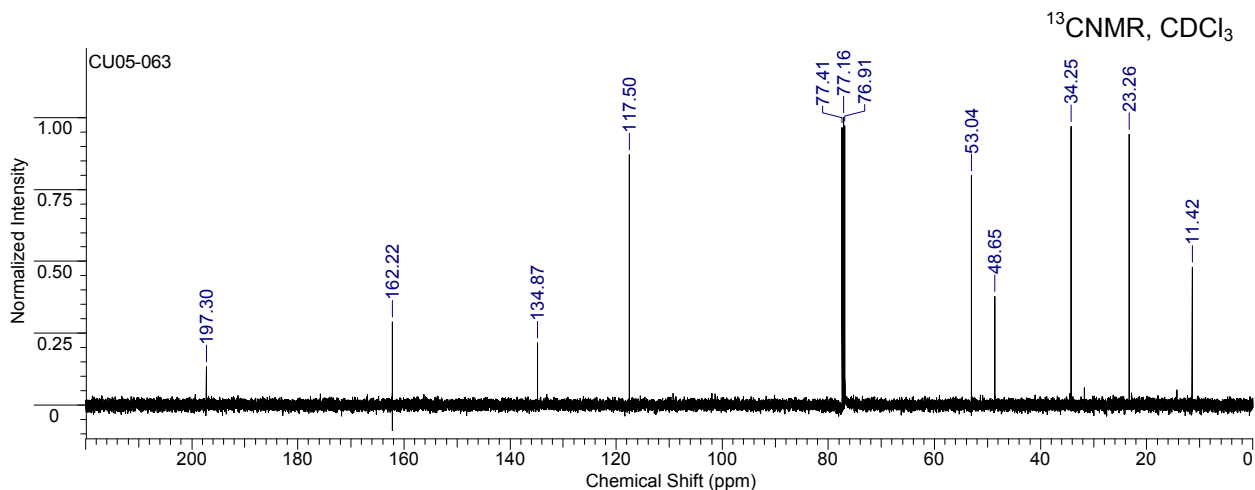

Racemic Sample: GC ( $\gamma$ -TA, 80 °C)

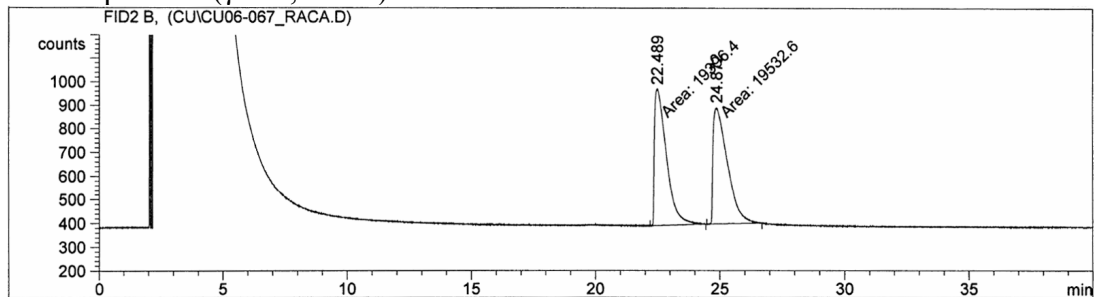

| Peak # | RetTime [min] | Type | Width [min] | Area counts*s | Height [counts] | Area %   |
|--------|---------------|------|-------------|---------------|-----------------|----------|
| 1      | 22.489        | MM   | 0.5563      | 1.93964e4     | 581.13910       | 49.82511 |
| 2      | 24.872        | MM   | 0.6588      | 1.95326e4     | 494.16528       | 50.17489 |

Enantioselective Sample: GC ( $\gamma$ -TA, 80 °C) 92% ee

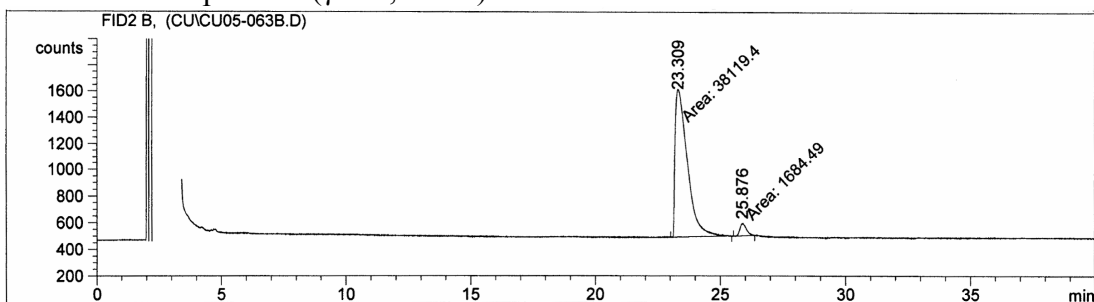

| Peak # | RetTime [min] | Type | Width [min] | Area counts*s | Height [counts] | Area %   |
|--------|---------------|------|-------------|---------------|-----------------|----------|
| 1      | 23.309        | MM   | 0.5633      | 3.81194e4     | 1127.95044      | 95.76803 |
| 2      | 25.876        | MM   | 0.2993      | 1684.48694    | 93.79235        | 4.23197  |

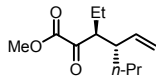

The substrate (21.2 mg, 0.1 mmol) and catalyst (27.4 mg, 0.02 mmol) in 2.0 mL of hexanes were stirred at 22 °C for 14 days. After column chromatography (eluting with 1:1 hexanes/CH<sub>2</sub>Cl<sub>2</sub>), 19.5 mg of product (92% yield) was obtained. This material was determined to be 85% ee by chiral GC analysis ( $\gamma$ -TA, 90 °C,  $t_r$ (major) = 31.6 min,  $t_r$ (minor) = 28.8 min);  $[\alpha]_D^{26} +15.9^\circ$  (c = 0.74, CHCl<sub>3</sub>); <sup>1</sup>HNMR (400 MHz, CDCl<sub>3</sub>):  $\delta$  5.44 (1H, td, J = 9.9, 16.8 Hz), 5.06 (1H, d, J = 9.9 Hz), 4.98 (1H, d, J = 17.2 Hz), 3.87 (3H, s), 3.14 (1H, m), 3.41 (1H, apparent p, J = 7.9 Hz), 1.62 (2H, m), 1.1–1.4 (4H, m), 0.87 (3H, t, J = 7.1 Hz), 0.81 (3H, t, J = 7.5 Hz); <sup>13</sup>C{<sup>1</sup>H}NMR (100 MHz, CDCl<sub>3</sub>):  $\delta$  197.7, 162.5, 138.8, 117.2, 53.5, 53.1, 45.1, 35.1, 21.3, 20.5, 14.9, 11.6; HRMS  $[M+Na]^+$  calculated for C<sub>12</sub>H<sub>20</sub>O<sub>3</sub>: 235.13047, found: 235.13091; FTIR (neat, cm<sup>-1</sup>): 2961 (m), 2635 (w), 2875 (w), 1728 (s), 1461 (w), 1285 (m), 1248 (m), 1050 (m), 918 (w).

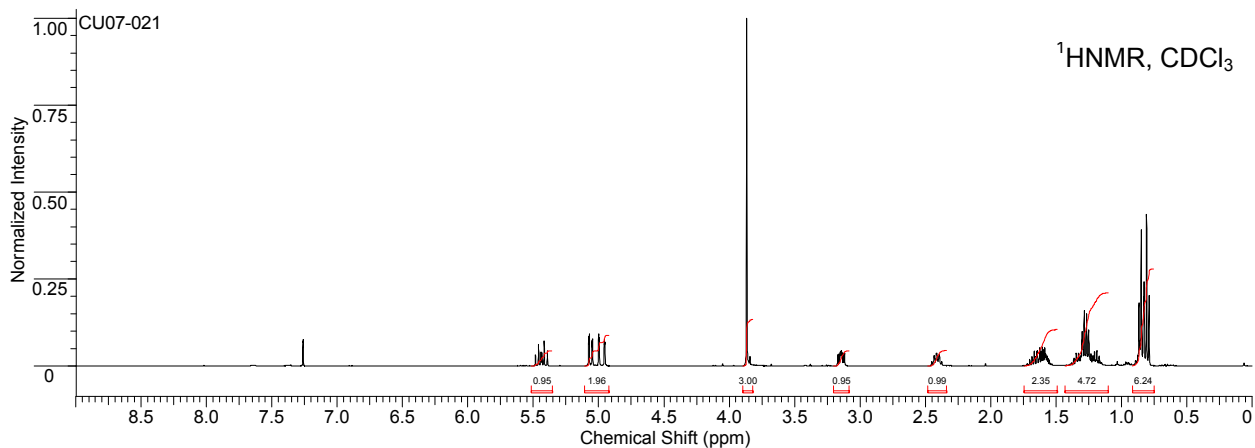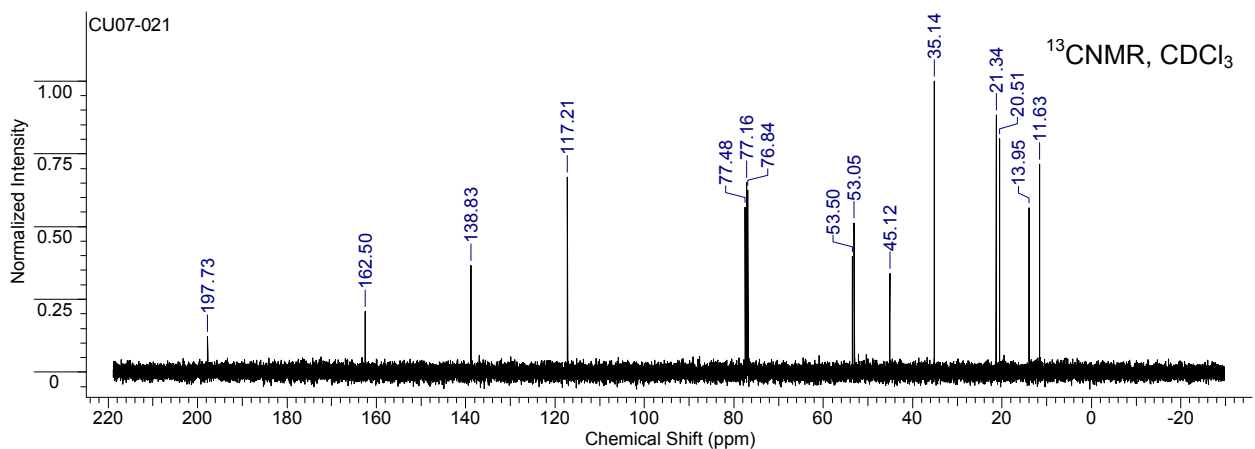

Racemic Sample: GC ( $\gamma$ -TA, 90 °C)

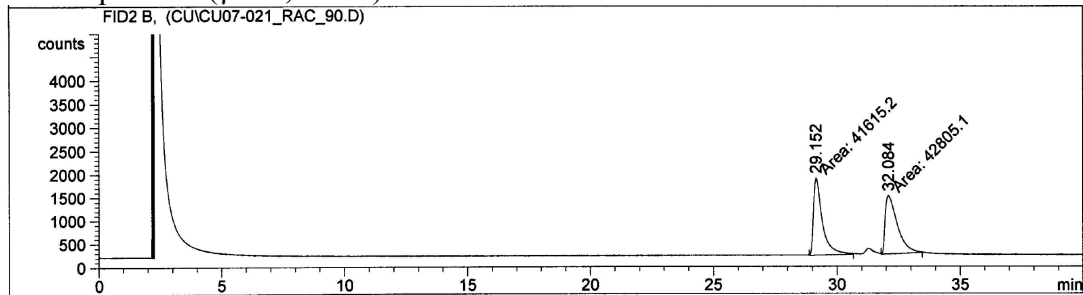

| Peak # | RetTime [min] | Type | Width [min] | Area counts*s | Height [counts] | Area %   |
|--------|---------------|------|-------------|---------------|-----------------|----------|
| 1      | 29.152        | MM   | 0.4168      | 4.16152e4     | 1663.96021      | 49.29524 |
| 2      | 32.084        | MM   | 0.5667      | 4.28051e4     | 1258.95178      | 50.70476 |

Totals : 8.44203e4 2922.91199

Enantioselective Sample: GC ( $\gamma$ -TA, 90 °C) 85% ee

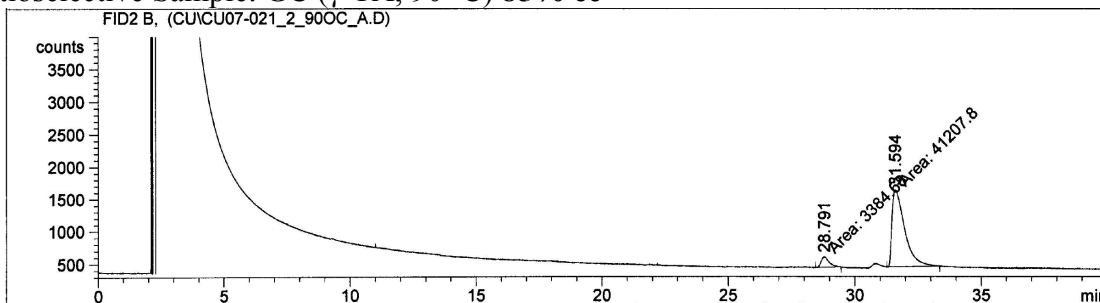

| Peak # | RetTime [min] | Type | Width [min] | Area counts*s | Height [counts] | Area %   |
|--------|---------------|------|-------------|---------------|-----------------|----------|
| 1      | 28.791        | MM   | 0.3552      | 3384.67676    | 158.82344       | 7.59025  |
| 2      | 31.594        | MM   | 0.5768      | 4.12078e4     | 1190.72717      | 92.40975 |

Totals : 4.45924e4 1349.55061

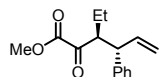

The substrate (24.6 mg, 0.1 mmol) and catalyst (27.4 mg, 0.02 mmol) in 2.0 mL of hexanes were stirred at 22 °C for 5 days. After column chromatography (eluting with 1:1 hexanes/CH<sub>2</sub>Cl<sub>2</sub>), 22.4 mg of product (91% yield) was obtained as a mixture of 19:1 anti/syn diastereomers. This material was determined to be 81% ee by chiral HPLC analysis (OD-H, 0.1% IPA in hexanes, 1.0 mL/min, *t<sub>r</sub>*(major)= 19.5 min, *t<sub>r</sub>*(minor) = 21.9 min). The minor diastereomer was produced in 78% ee (*t<sub>r</sub>*(major)= 16.4 min, *t<sub>r</sub>*(minor) = 18.0 min);  $[\alpha]_D^{27} = -63.2^\circ$  (*c* = 0.865, CHCl<sub>3</sub>); <sup>1</sup>HNMR (500 MHz, CDCl<sub>3</sub>): δ 7.26 (2H, m), 7.15-7.18 (3H, m), 5.94 (1H, td, *J* = 9.6, 16.9 Hz), 5.13 (1H, d, *J* = 10.8 Hz), 5.10 (1H, d, *J* = 3.9 Hz), 3.73 (1H, td, *J* = 6.6, 10.3 Hz), 3.64 (3H, s), 3.57 (1H, t, *J* = 9.7 Hz), 1.80 (2H, p, *J* = 7.1 Hz), 0.87 (3H, t, *J* = 7.4 Hz). <sup>13</sup>C{<sup>1</sup>H}NMR (125 MHz, CDCl<sub>3</sub>): δ 197.4, 161.9, 141.5, 138.8, 128.8, 128.1, 127.0, 116.9, 53.5, 52.9, 52.4, 23.1, 11.4; LRMS (ESI): 269.1 (100%) [M+Na]<sup>+</sup>; FTIR (neat, cm<sup>-1</sup>): 2968 (w), 1727 (s), 1453 (w), 1286 (w), 1247 (w), 1053 (m), 921 (w), 760 (w), 701 (m).

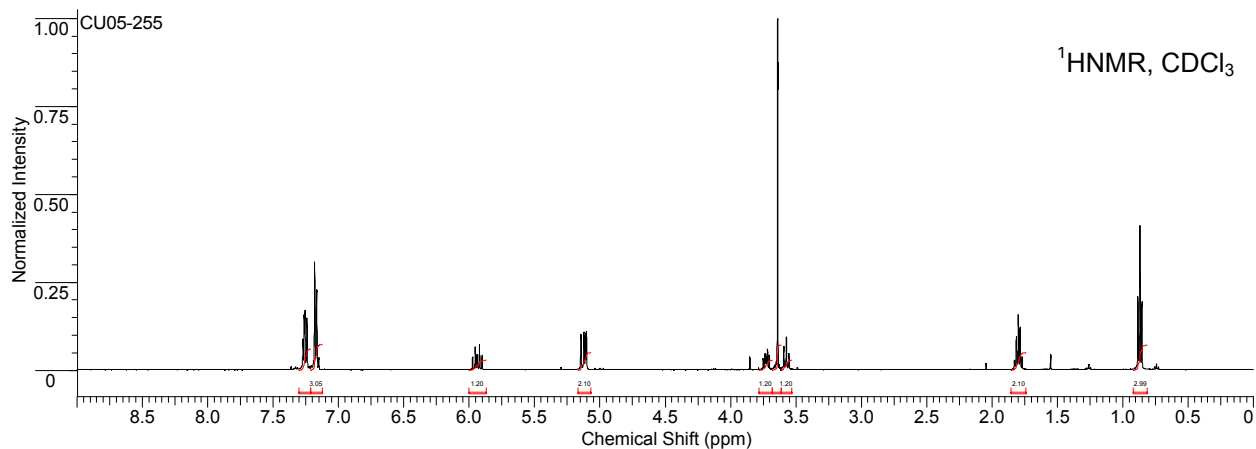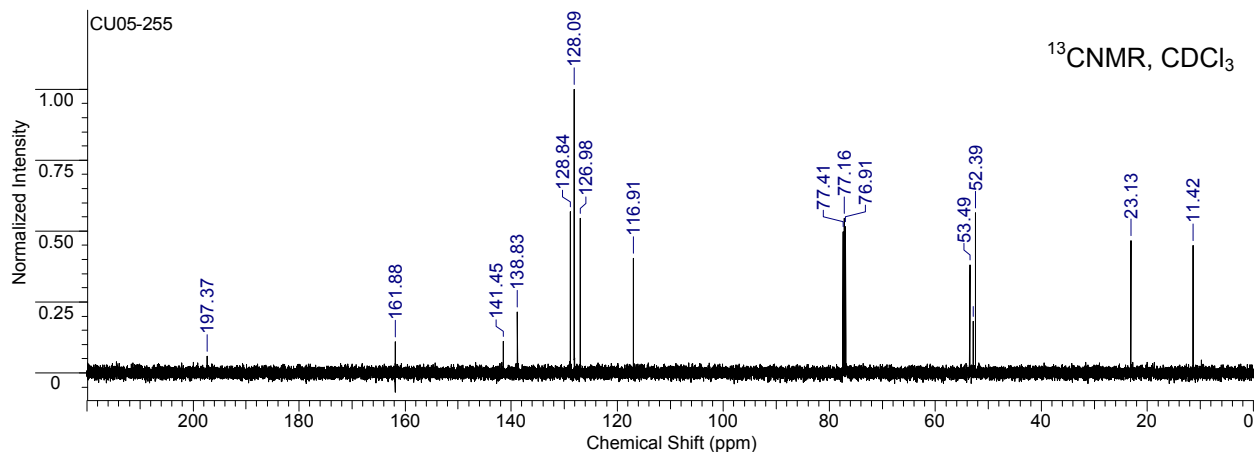

Racemic Sample: HPLC (OD-H, 0.1% IPA in hexanes, 1.0 mL/min, 210 nm)

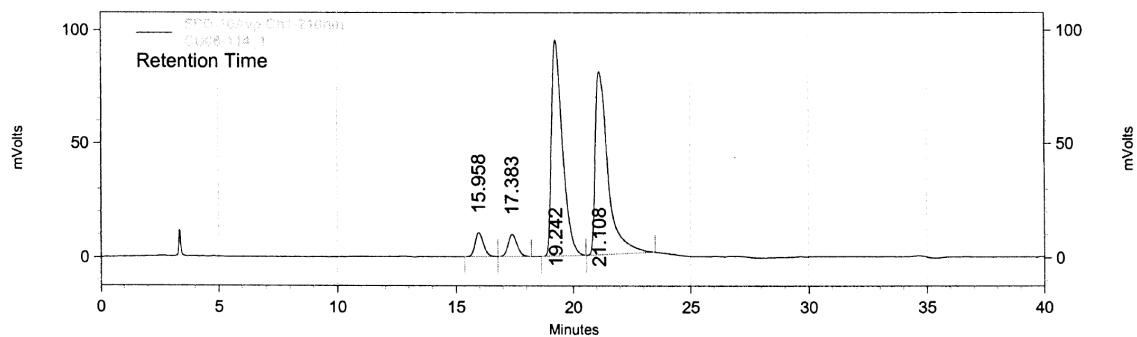

SPD-10Avp  
Ch1-210nm  
Results

| Retention Time | Area    | Area % | Height | Height % |
|----------------|---------|--------|--------|----------|
| 15.958         | 259112  | 3.90   | 10414  | 5.32     |
| 17.383         | 255524  | 3.84   | 9584   | 4.90     |
| 19.242         | 3083886 | 46.36  | 95038  | 48.57    |
| 21.108         | 3053097 | 45.90  | 80620  | 41.20    |

Enantioselective Sample: HPLC (OD-H, 0.1% IPA in hexanes, 1.0 mL/min, 210 nm) **81% ee**

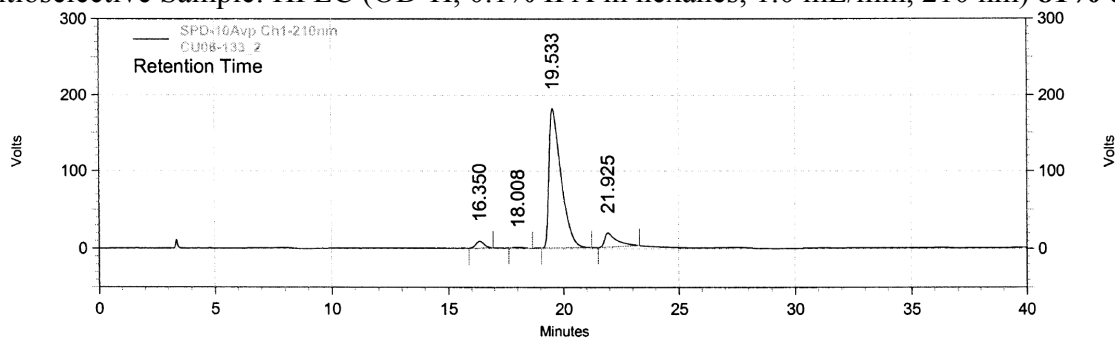

SPD-10Avp  
Ch1-210nm  
Results

| Retention Time | Area    | Area % | Height | Height % |
|----------------|---------|--------|--------|----------|
| 16.350         | 213064  | 2.86   | 8639   | 4.13     |
| 18.008         | 27132   | 0.36   | 1098   | 0.52     |
| 19.533         | 6532430 | 87.69  | 180997 | 86.51    |
| 21.925         | 676596  | 9.08   | 18494  | 8.84     |



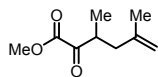

The substrate (17.0 mg, 0.1 mmol) and catalyst (27.4 mg, 0.02 mmol) in 2.0 mL of hexanes were stirred at 35 °C for 8 days. After column chromatography (eluting with 1:1 hexanes/CH<sub>2</sub>Cl<sub>2</sub>), 12.4 mg of product (73% yield) was obtained. This material was determined to be 96% ee by chiral HPLC analysis (AS-H, 0.1% IPA in hexanes, 0.5 mL/min, 210 nm, *t<sub>r</sub>*(major)= 16.0 min, *t<sub>r</sub>*(minor) = 18.3 min); [ $\alpha$ ]<sub>D</sub><sup>26</sup> +9.5° (c = 0.525, CHCl<sub>3</sub>); <sup>1</sup>HNMR (500 MHz, CDCl<sub>3</sub>): δ 4.79 (1H, s), 4.69 (1H, s), 3.87 (3H, s), 3.45 (1H, apparent sextet, J = 7.2 Hz), 2.46 (1H, dd, J = 6.4, 14.0 Hz), 2.04 (1H, dd, J = 8.2, 14.0 Hz), 1.73 (3H, s), 1.13 (3H, d, J = 7.1 Hz); <sup>13</sup>C{<sup>1</sup>H}NMR (125 MHz, CDCl<sub>3</sub>): δ 197.5, 162.0, 142.2, 113.1, 53.0, 40.3, 40.2, 22.3, 15.3; HRMS [M+Na]<sup>+</sup> calculated for C<sub>9</sub>H<sub>14</sub>O<sub>3</sub>: 193.08352, found: 193.08304; FTIR (neat, cm<sup>-1</sup>): 2975 (w), 2939 (w), 1732 (s), 1455 (w), 1438 (w), 1277 (m), 1256 (m), 1041 (m), 1022 (w)

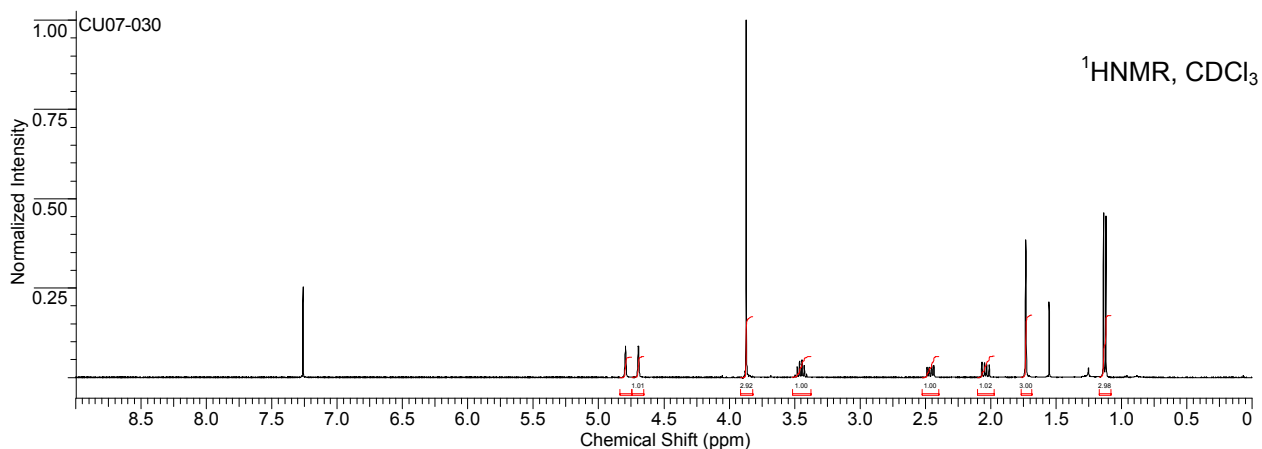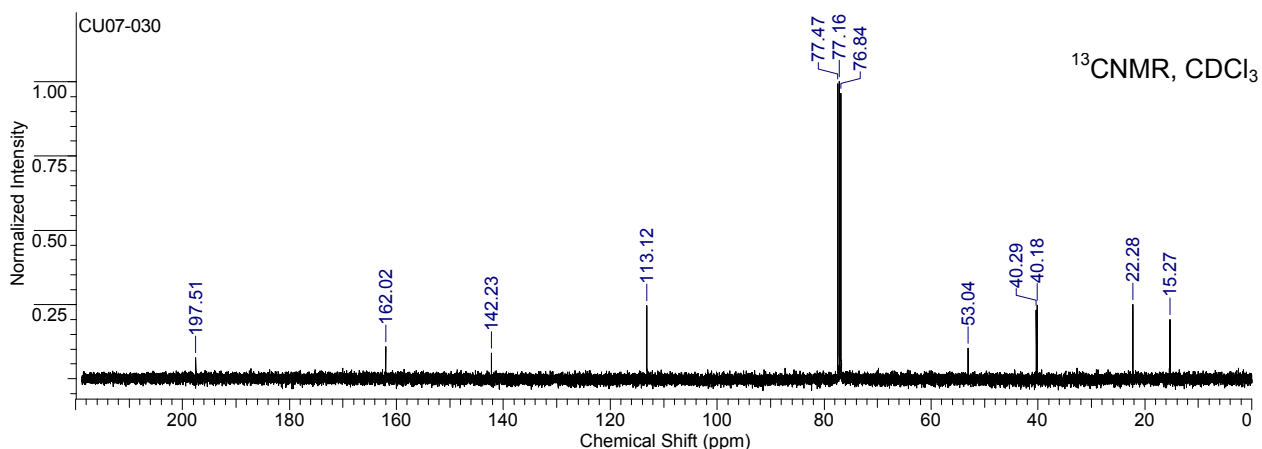

Racemic Sample: HPLC (AS-H, 0.1% IPA in hexanes, 0.5 mL/min, 210 nm)

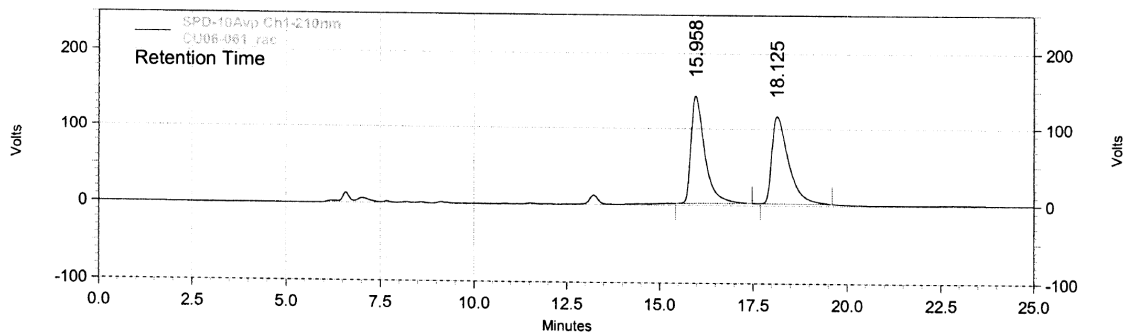

**SPD-10Avp  
Ch1-210nm  
Results**

| Retention Time | Area    | Area % | Height | Height % |
|----------------|---------|--------|--------|----------|
| 15.958         | 3588466 | 50.79  | 141112 | 55.26    |
| 18.125         | 3476877 | 49.21  | 114231 | 44.74    |

Enantioselective Sample: HPLC (AS-H, 0.1% IPA in hexanes, 0.5 mL/min, 210 nm) **96% ee**

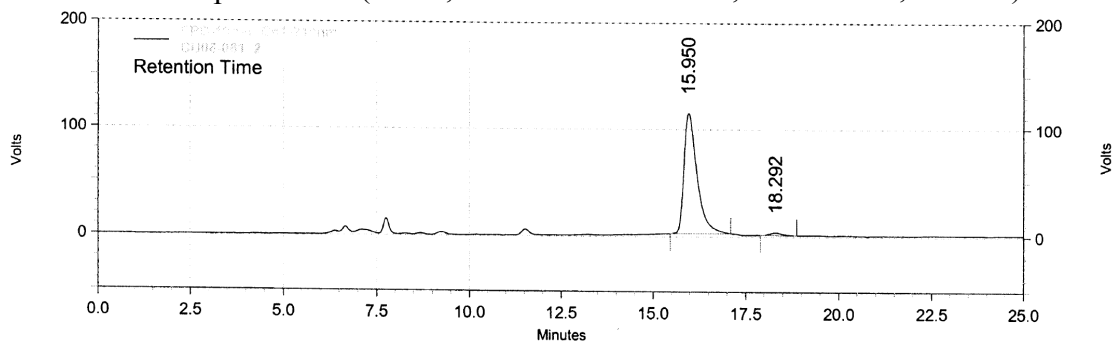

**SPD-10Avp  
Ch1-210nm  
Results**

| Retention Time | Area    | Area % | Height | Height % |
|----------------|---------|--------|--------|----------|
| 15.950         | 2748792 | 98.02  | 112737 | 97.87    |
| 18.292         | 55621   | 1.98   | 2459   | 2.13     |

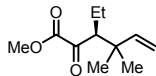

The substrate (19.8 mg, 0.1 mmol) and catalyst (27.4 mg, 0.02 mmol) in 2.0 mL of hexanes were stirred at 40 °C for 4 days. After column chromatography (eluting with 1:1 hexanes/CH<sub>2</sub>Cl<sub>2</sub>), 17.6 mg of product (89% yield) was obtained. This material was determined to be 81% ee by chiral HPLC analysis (OD-H, 0.1% IPA in hexanes, 0.4 mL/min, 230 nm, *t<sub>r</sub>*(major)= 17.2 min, *t<sub>r</sub>*(minor) = 18.7 min); [ $\alpha$ ]<sub>D</sub><sup>27</sup> +84.2° (c = 0.615, CHCl<sub>3</sub>); <sup>1</sup>HNMR (500 MHz, CDCl<sub>3</sub>): δ 5.82 (1H, dd, J = 11.0, 17.4 Hz), 4.96 (1H, d, J = 11.0 Hz), 4.92 (1H, d, J = 17.4 Hz), 3.85 (3H, s), 3.35 (1H, dd, J = 2.7, 11.9 Hz), 1.74 (1H, m), 1.51 (1H, m), 1.04 (3H, s), 1.00 (3H, s), 0.80 (3H, t, J = 7.3 Hz). <sup>13</sup>C{<sup>1</sup>H}NMR (100 MHz, CDCl<sub>3</sub>): δ 198.8, 163.1, 145.6, 112.6, 56.7, 53.2, 40.4, 24.8, 23.8, 20.7, 13.0; LRMS (ESI): 221.1 (95%) [M+Na]<sup>+</sup>; FTIR (neat, cm<sup>-1</sup>): 2069 (s), 1727 (s), 1461 (w), 1281 (m), 1256 (m), 1057 (s), 918 (w).

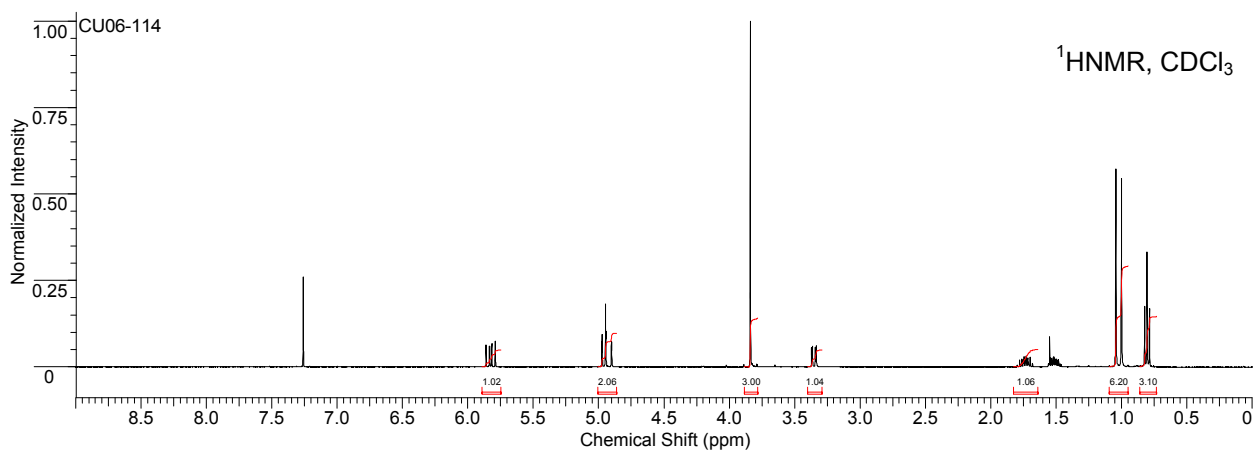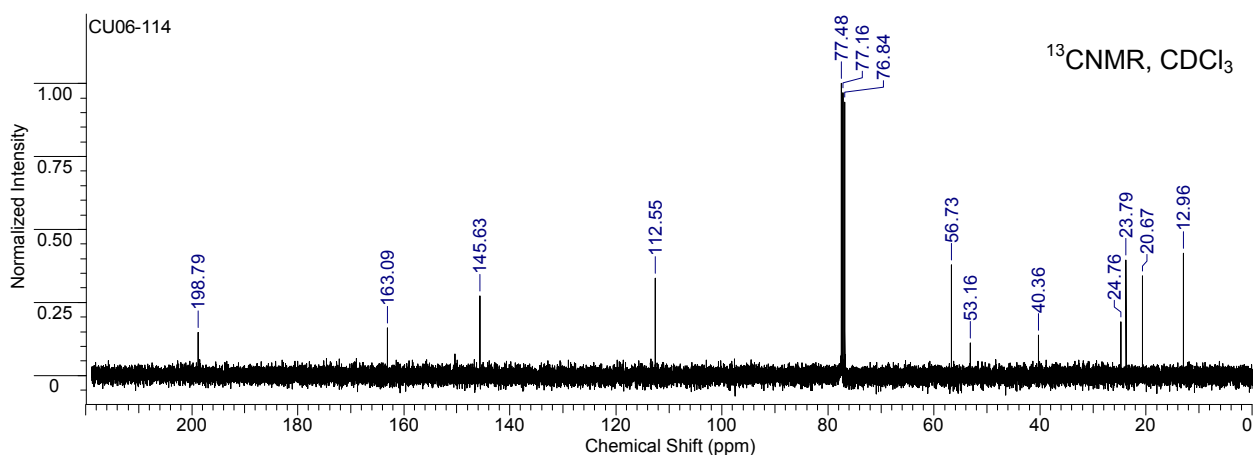

Racemic Sample: HPLC (OD-H, 0.1% IPA in hexanes, 0.4 mL/min, 230 nm)

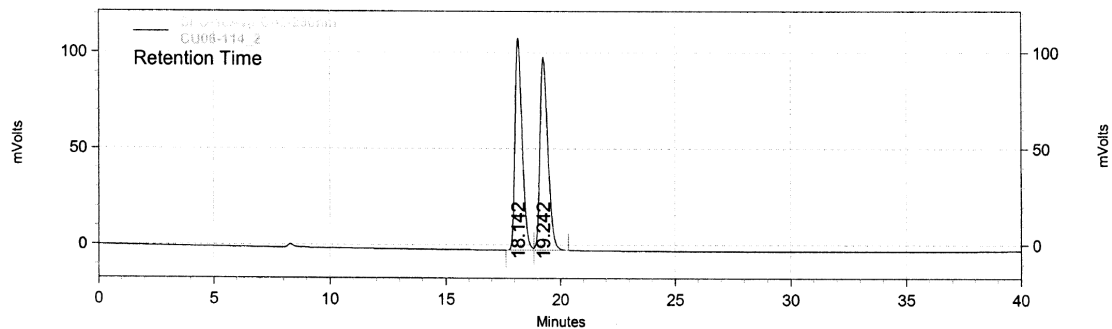

**SPD-10Avp  
Ch2-230nm  
Results**

| Retention Time | Area    | Area % | Height | Height % |
|----------------|---------|--------|--------|----------|
| 18.142         | 2395863 | 49.89  | 110066 | 52.29    |
| 19.242         | 2406419 | 50.11  | 100415 | 47.71    |

Enantioselective Sample: HPLC (OD-H, 0.1% IPA in hexanes, 0.4 mL/min, 230 nm) **81% ee**

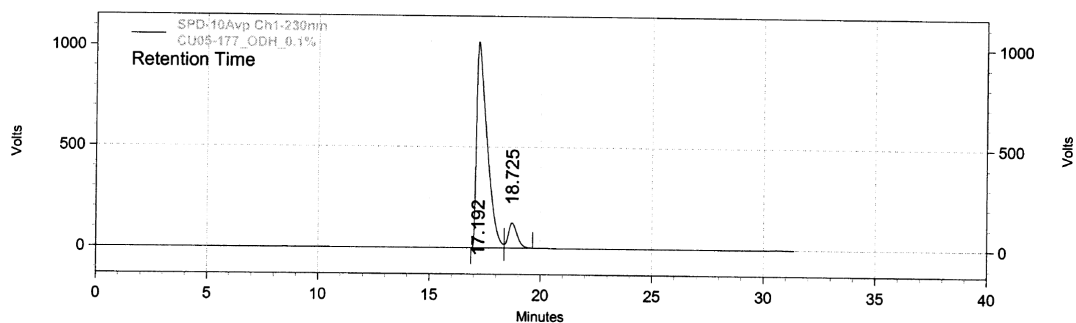

**SPD-10Avp  
Ch1-230nm  
Results**

| Retention Time | Area     | Area % | Height  | Height % |
|----------------|----------|--------|---------|----------|
| 17.192         | 33442046 | 90.74  | 1025306 | 89.25    |
| 18.725         | 3414452  | 9.26   | 123534  | 10.75    |

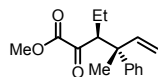

The substrate (26.0 mg, 0.1 mmol) and catalyst (27.4 mg, 0.02 mmol) in 2.0 mL of hexanes were stirred at 40 °C for 12 days. After column chromatography (eluting with 1:1 hexanes/CH<sub>2</sub>Cl<sub>2</sub>), 23.5 mg of product (89% yield) was obtained. This material was determined to be 82% ee by chiral HPLC analysis (OD-H, 0.5% IPA in hexanes, 1.0 mL/min, 210 nm, *t<sub>r</sub>*(major)= 7.2 min, *t<sub>r</sub>*(minor) = 8.5 min); [ $\alpha$ ]<sub>D</sub><sup>27</sup> +69.0° (c = 0.84, CHCl<sub>3</sub>); <sup>1</sup>HNMR (500 MHz, CDCl<sub>3</sub>): δ 7.33 (2H, d, J = 8.5 Hz), 7.28 (2H, t, J = 7.6 Hz), 7.18 (1H, t, J = 7.2 Hz), 6.16 (1H, dd, J = 17.4, 10.8 Hz), 5.22 (1H, d, J = 10.8 Hz), 5.10 (1H, d, J = 17.4 Hz), 3.96 (1H, d, J = 11.4 Hz), 3.46 (3H, s), 1.85 (1H, m), 1.56 (1H, m), 1.42 (3H, s), 0.82 (3H, t, J = 7.3 Hz). <sup>13</sup>C{<sup>1</sup>H}NMR (125 MHz, CDCl<sub>3</sub>): δ 198.3 162.9, 144.4, 143.9, 128.5, 127.2, 126.8, 113.9, 57.0, 52.6, 47.1, 21.1, 19.4, 12.9; LRMS (ESI): 283.1 (100%) [M+Na]<sup>+</sup>; FTIR (neat, cm<sup>-1</sup>): 2968 (m), 1731 (s), 1446 (w), 1286 (w), 1256 (m), 1055 (m), 762 (w), 701 (m).

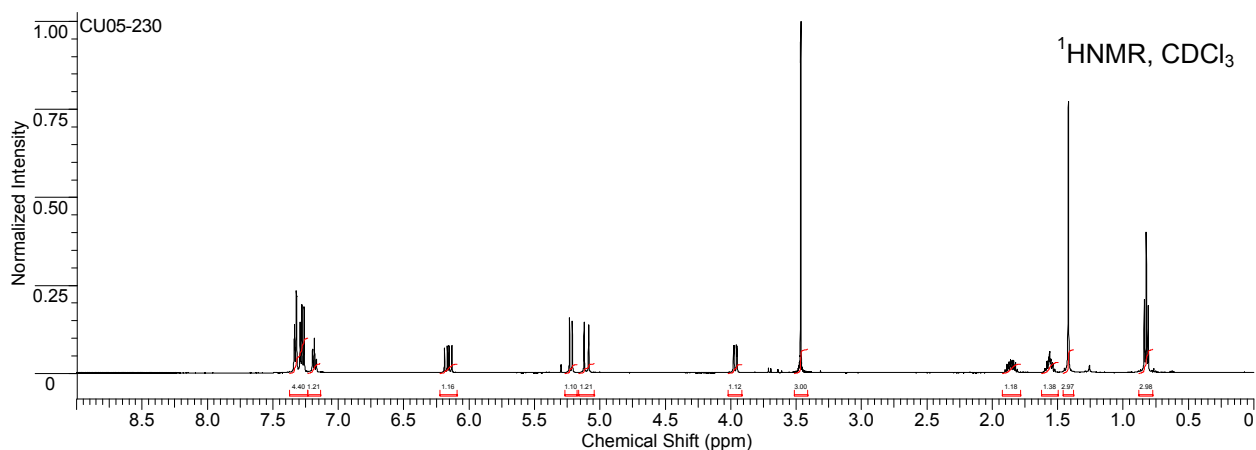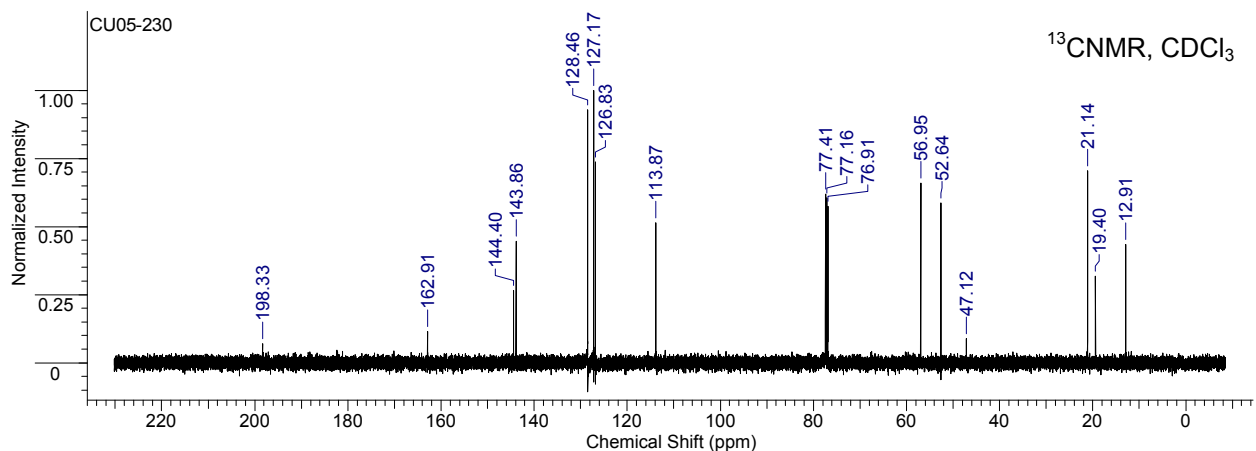

Racemic Sample: HPLC (OD-H, 0.5% IPA in hexanes, 1.0 mL/min, 210 nm)

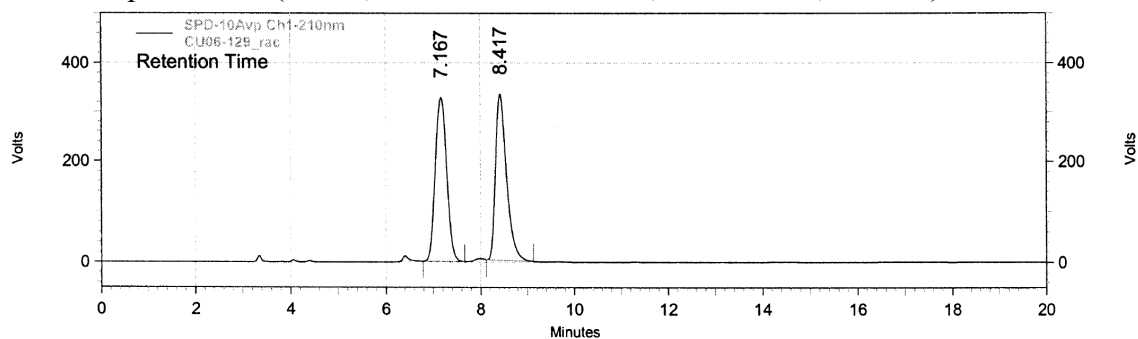

SPD-10Avp  
Ch1-210nm  
Results

| Retention Time | Area    | Area % | Height | Height % |
|----------------|---------|--------|--------|----------|
| 7.167          | 5486863 | 50.54  | 328477 | 49.65    |
| 8.417          | 5369641 | 49.46  | 333120 | 50.35    |

Enantioselective Sample: HPLC (OD-H, 0.5% IPA in hexanes, 1.0 mL/min, 210 nm) **82% ee**

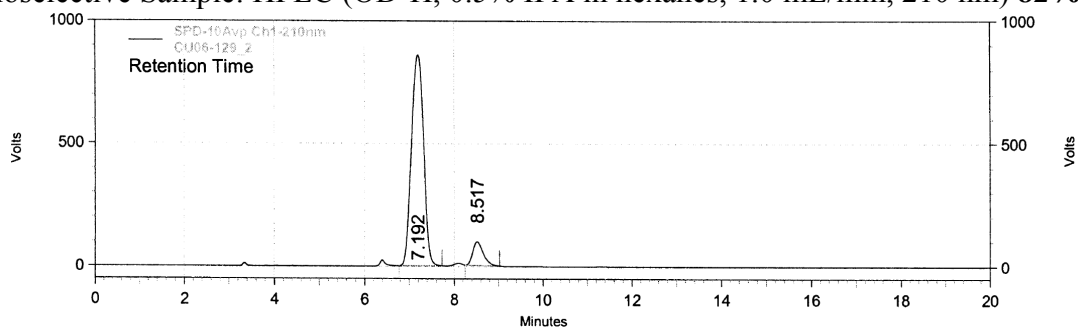

SPD-10Avp  
Ch1-210nm  
Results

| Retention Time | Area     | Area % | Height | Height % |
|----------------|----------|--------|--------|----------|
| 7.192          | 16272743 | 91.12  | 861527 | 89.94    |
| 8.517          | 1586297  | 8.88   | 96332  | 10.06    |

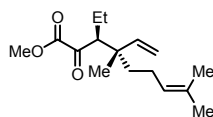

The substrate (26.6 mg, 0.1 mmol) and catalyst (27.4 mg, 0.02 mmol) in 2.0 mL of hexanes were stirred at 40 °C for 14 days. After column chromatography (eluting with 1:1 hexanes/CH<sub>2</sub>Cl<sub>2</sub>), 19.4 mg of product (74% yield) was obtained. This material was determined to be 84% ee by chiral GC analysis ( $\gamma$ -TA, 80 °C,  $t_r$ (major) = 290.7 min,  $t_r$ (minor) = 277.7 min);  $[\alpha]_D^{27} +33.1^\circ$  (c = 0.392, CHCl<sub>3</sub>); <sup>1</sup>HNMR (500 MHz, CDCl<sub>3</sub>):  $\delta$ 5.68 (1H, dd, J = 10.9, 17.4 Hz), 5.11 (1H, d, J = 10.8 Hz), 5.00 (1H, t, J = 7.1 Hz), 4.95 (1H, d, J = 17.4 Hz), 3.85 (3H, s), 3.35 (1H, dd, J = 2.5, 11.7 Hz), 1.85 (2H, apparent q, J = 8.0 Hz), 1.72 (1H, m), 1.65 (3H, s), 1.55 (3H, s), 1.52 (1H, m), 1.42 (1H, m), 1.26 (1H, m), 1.03 (3H, s), 0.80 (3H, t, 7.4 Hz); <sup>13</sup>C{<sup>1</sup>H}NMR (125 MHz, CDCl<sub>3</sub>):  $\delta$ 199.4, 163.2, 143.9, 131.7, 124.3, 114.3, 56.7, 53.2, 44.2, 39.0, 25.8, 22.8, 21.1, 18.7, 17.9, 12.9; HRMS [M+Na]<sup>+</sup> calculated for C<sub>16</sub>H<sub>26</sub>O<sub>3</sub>: 289.17742, found: 289.17599; FTIR (neat, cm<sup>-1</sup>): 2967 (m), 2932 (w), 2878 (w), 1732 (s), 1460 (w), 1379 (w), 1278 (w), 1255 (m), 1054 (m), 917 (w).

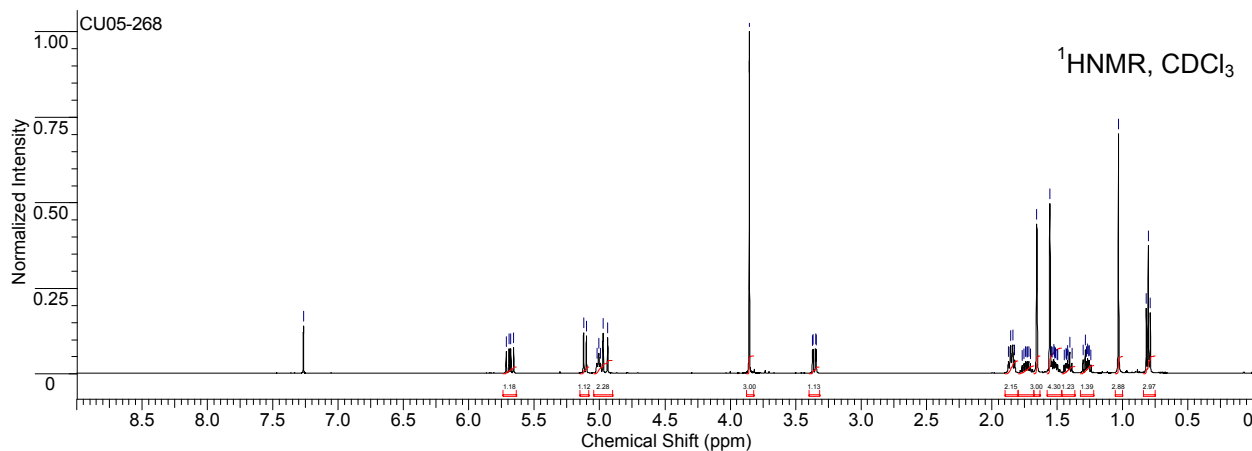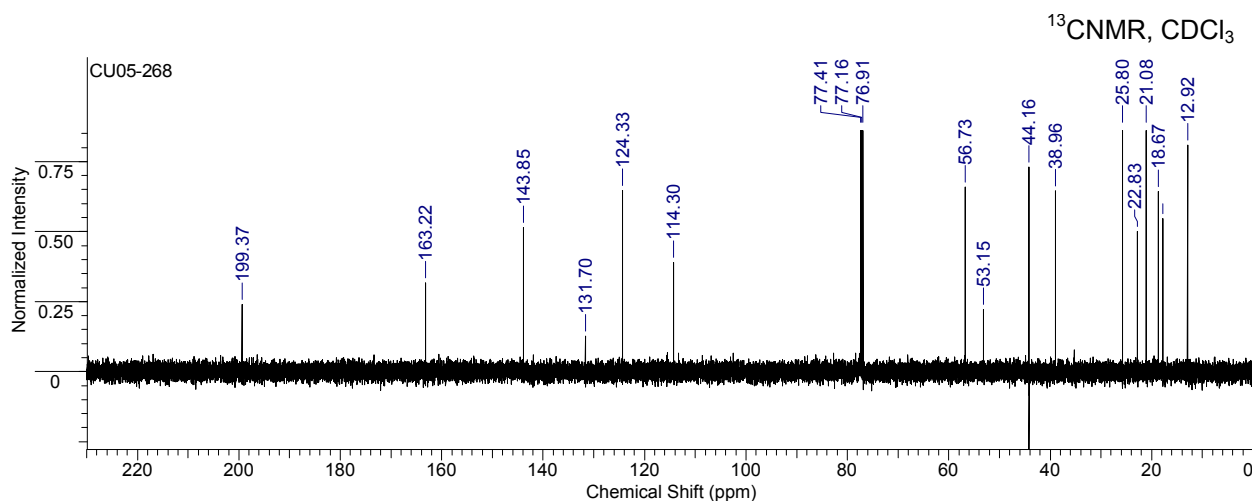

Racemic Sample: GC ( $\gamma$ -TA, 80 °C)

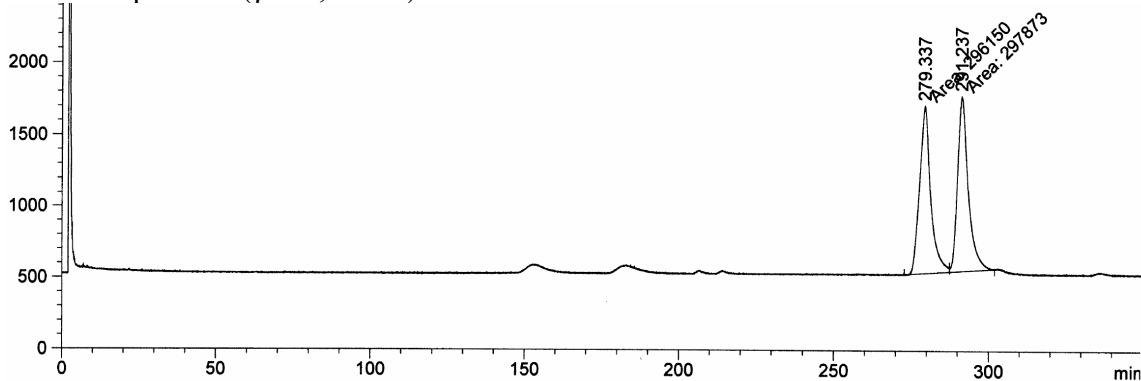

| Peak # | RetTime [min] | Type | Width [min] | Area counts*s | Height [counts] | Area %   |
|--------|---------------|------|-------------|---------------|-----------------|----------|
| 1      | 279.337       | MF   | 4.1577      | 2.96150e5     | 1187.15271      | 49.85495 |
| 2      | 291.237       | FM   | 4.0006      | 2.97873e5     | 1240.96448      | 50.14505 |

Enantioselective Sample: GC ( $\gamma$ -TA, 80 °C) 84% ee

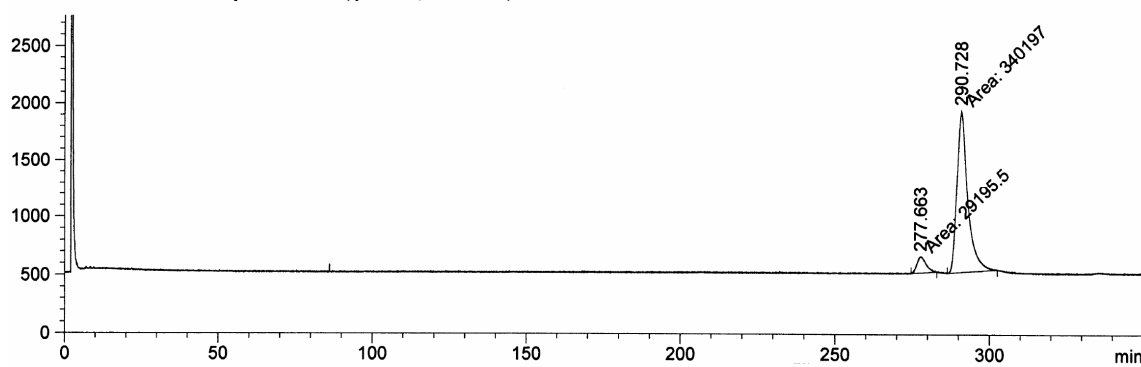

| Peak # | RetTime [min] | Type | Width [min] | Area counts*s | Height [counts] | Area %   |
|--------|---------------|------|-------------|---------------|-----------------|----------|
| 1      | 277.663       | MM   | 3.3853      | 2.91955e4     | 143.73730       | 7.90365  |
| 2      | 290.728       | MM   | 3.9673      | 3.40197e5     | 1429.17505      | 92.09635 |



## 7. Determination of the Absolute Stereochemistry

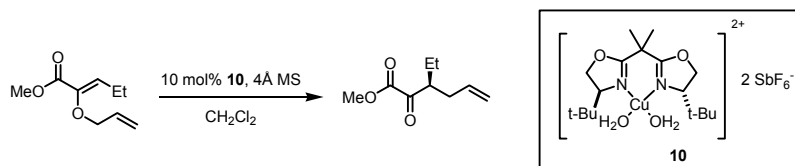

According to Hiersemann's general procedure,<sup>5</sup> **10** (4.3 mg, 0.005 mmol) was dissolved in 250 μL of CH<sub>2</sub>Cl<sub>2</sub>, and stirred under N<sub>2</sub> at ambient temperature for 5 min. 12.5 mg of powdered 4Å molecular sieves was added, and stirring was continued for 5 min. Substrate (8.5 mg, 0.05 mmol) in 250 μL of CH<sub>2</sub>Cl<sub>2</sub> was added, and the reaction was stirred at ambient temperature for 24 h. The reaction mixture was diluted with 1 mL of hexanes and loaded directly onto a column (eluting with 1:1 hexanes/CH<sub>2</sub>Cl<sub>2</sub>). The product was determined to be 95% ee, and the major enantiomer was that obtained with **2** derived from the (R,R)-enantiomer of *trans*-1,2-diaminocyclohexane.

Enantioselective Sample: GC (γ-TA, 80 °C) 95% ee

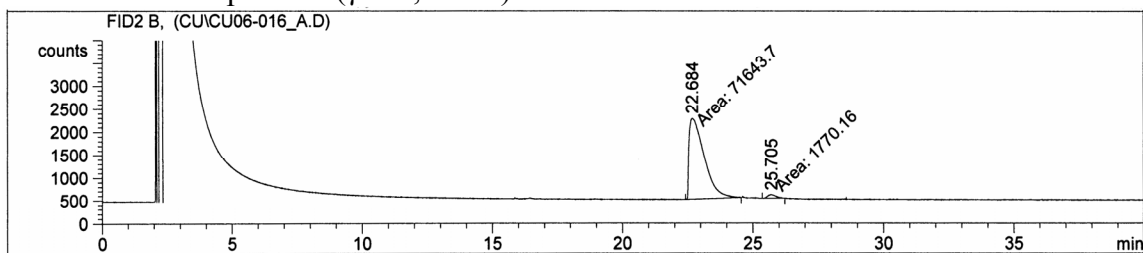

| Peak # | RetTime [min] | Type | Width [min] | Area counts*s | Height [counts] | Area %   |
|--------|---------------|------|-------------|---------------|-----------------|----------|
| 1      | 22.684        | MM   | 0.6748      | 7.16437e4     | 1769.55237      | 97.58879 |
| 2      | 25.705        | MM   | 0.3723      | 1770.16443    | 79.23978        | 2.41121  |

## 8. X-Ray Structure of 2

### Experimental

The compound was crystallized from a water/isopropanol solution as colorless prisms. A crystal 0.150 mm x 0.175 mm x 0.300 mm in size was selected, mounted on a glass fiber with Paratone-N oil, and transferred to a Bruker SMART APEX II diffractometer equipped with an Oxford Cryosystems 700 Series Cryostream Cooler and Mo K $\alpha$  radiation ( $\lambda = 0.71073 \text{ \AA}$ ). A total of 1613 frames were collected at 193 (2) K to  $\theta_{\max} = 27.50^\circ$  with an  $\omega$  oscillation range of  $0.5^\circ/\text{frame}$ , and an exposure time of 30 s/frame using the APEX2 suite of software. (Bruker AXS, 2006a) Unit cell refinement on all observed reflections, and data reduction with corrections for Lp and decay were performed using SAINT. (Bruker AXS, 2006b) Scaling and a multi-scan absorption correction were done using SADABS. (Bruker AXS, 2004) The minimum and maximum transmission factors were 0.9629 and 0.9812, respectively. A total of 50675 reflections were collected, 16387 were unique ( $R_{\text{int}} = 0.0273$ ), and 13214 had  $I > 2\sigma(I)$ . Systematic absences were consistent with the compound having crystallized in the monoclinic space group  $P2_1$  or  $P2_1/m$ . The chiral space group  $P2_1$  (No. 4) was selected based on an observed mean  $|E^2 - 1|$  value of 0.771 (versus the expectation values of 0.968 and 0.736 for centric and noncentric data, respectively).

The structure was solved by direct methods and refined by full-matrix least-squares on  $F^2$  using SHELXTL. (Bruker AXS, 2001) The asymmetric unit was found to contain one bis[(1*R*,2*R*)-2-(2-phenyl-1*H*-pyrrol-1-yl)cyclohexylamino]methaniminium cation, one tetrakis[3,5-bis(trifluoromethyl)phenyl]borate anion, and two isopropanol solvent molecules. All of the nonhydrogen atoms were refined with anisotropic displacement coefficients. The hydrogen atoms were assigned isotropic displacement coefficients  $U(\text{H}) = 1.2U(\text{C})$ ,  $1.5U(\text{C}_{\text{methyl}})$ ,  $1.5U(\text{N})$  or  $1.5U(\text{O})$ , and their coordinates were treated as follows: (1) The coordinates for the N-bound hydrogens H(2A), H(2B), H(3) and H(4) and for the hydroxy hydrogen H(1SO) for the ordered isopropanol were free to vary, and (2) the coordinates for all other hydrogens were allowed to ride on their respective carbons or oxygens. Two-site disorder models were used for six of the eight trifluoromethyl groups and for one of the isopropanol molecules. All of the partial atoms were assigned fixed site occupancy factors of a half based on initial population tests. Distance, isotropic and similar  $U_{ij}$  restraints were also employed. The refinement converged to  $R(F) = 0.0436$ ,  $wR(F^2) = 0.1028$ , and  $S = 1.014$  for 13214 reflections with  $I > 2\sigma(I)$ , and  $R(F) = 0.0590$ ,  $wR(F^2) = 0.1119$ , and  $S = 1.014$  for 16387 unique reflections, 1145 parameters and 220 restraints. The maximum  $|\Delta/\sigma|$  in the final cycle of least-squares was 0.001, and the residual peaks on the final difference-Fourier map ranged from -0.237 to  $0.274 \text{ e\AA}^{-3}$ . Scattering factors were taken from the International Tables for Crystallography, Volume C. (Maslen et al., 1992, and Creagh & McAuley, 1992)

The Flack parameter refined to -0.1 (4) [versus the expectation values of 0 for the correct hand and 1 for the wrong hand]. Due to the large standard uncertainty associated with the Flack parameter, and in the absence of an anomalous scatterer, the absolute structure of the cation could not be ascertained from the collected intensity data. Hence, the coordinates used here were arbitrarily fixed to the (1*R*,2*R*) enantiomer desired by the researchers. (Flack, 1983)

## References

- Bruker AXS (2001). *SHELXTL v6.12*. Bruker Analytical X-ray Systems Inc., Madison, Wisconsin, USA.  
Bruker AXS (2004). *SADABS*. Bruker Analytical X-ray Systems Inc., Madison, Wisconsin, USA.  
Bruker AXS (2006a). *APEX2 v2.1-0*. Bruker Analytical X-ray Systems Inc., Madison, Wisconsin, USA.  
Bruker AXS (2006b). *SAINT V7.34A*. Bruker Analytical X-ray Systems Inc., Madison, Wisconsin, USA.  
Creagh, D. C. & McAuley, W. J. (1992). *International Tables for Crystallography: Mathematical, Physical and Chemical Tables*, Vol C, edited by A. J. C. Wilson, pp. 206-222. Dordrecht, The Netherlands: Kluwer.  
Flack, H. D. (1983). *Acta Crystallographica, Section A*, 39, 876-881.  
Maslen, E. N., Fox, A. G. & O'Keefe, M. A. (1992). *International Tables for Crystallography: Mathematical, Physical and Chemical Tables*, Vol C, edited by A. J. C. Wilson, pp. 476-516. Dordrecht, The Netherlands: Kluwer.

$R(F) = R1 = \sum |F_o| - |F_c| / \sum |F_o|$ ,  $wR(F^2) = wR2 = [ \sum w (F_o^2 - F_c^2)^2 / \sum w (F_o^2)^2 ]^{1/2}$ , and  $S = \text{Goodness-of-fit on } F^2 = [ \sum w (F_o^2 - F_c^2)^2 / (n-p) ]^{1/2}$ , where  $n$  is the number of reflections and  $p$  is the number of parameters refined.

## Crystal data and structure refinement.

---

|                                   |                                             |                |
|-----------------------------------|---------------------------------------------|----------------|
| Identification code               | enj078                                      |                |
| Empirical formula                 | C71 H68 B F24 N5 O2                         |                |
| Formula weight                    | 1490.11                                     |                |
| Temperature                       | 193(2) K                                    |                |
| Wavelength                        | 0.71073 Å                                   |                |
| Crystal system                    | Monoclinic                                  |                |
| Space group                       | P2 <sub>1</sub> (No. 4)                     |                |
| Unit cell dimensions              | a = 13.4974(1) Å                            | α = 90°        |
|                                   | b = 18.8077(2) Å                            | β = 96.092(1)° |
|                                   | c = 14.1387(1) Å                            | γ = 90°        |
| Volume                            | 3568.91(5) Å <sup>3</sup>                   |                |
| Z                                 | 2                                           |                |
| Density (calculated)              | 1.387 Mg/m <sup>3</sup>                     |                |
| Absorption coefficient            | 0.127 mm <sup>-1</sup>                      |                |
| F(000)                            | 1532                                        |                |
| Crystal size                      | 0.300 x 0.175 x 0.150 mm <sup>3</sup>       |                |
| Theta range for data collection   | 1.81 to 27.50°.                             |                |
| Index ranges                      | -16 ≤ h ≤ 17, -24 ≤ k ≤ 24, -18 ≤ l ≤ 18    |                |
| Reflections collected             | 50675                                       |                |
| Independent reflections           | 16387 [R(int) = 0.0273]                     |                |
| Completeness to theta = 27.50°    | 100.0 %                                     |                |
| Absorption correction             | Semi-empirical from equivalents             |                |
| Max. and min. transmission        | 0.9812 and 0.9629                           |                |
| Refinement method                 | Full-matrix least-squares on F <sup>2</sup> |                |
| Data / restraints / parameters    | 16387 / 220 / 1145                          |                |
| Goodness-of-fit on F <sup>2</sup> | 1.014                                       |                |
| Final R indices [I > 2σ(I)]       | R1 = 0.0436, wR2 = 0.1028                   |                |
| R indices (all data)              | R1 = 0.0590, wR2 = 0.1119                   |                |
| Absolute structure parameter      | -0.1(4)                                     |                |
| Largest diff. peak and hole       | 0.274 and -0.237 e.Å <sup>-3</sup>          |                |

---

## Unit Cell Diagram Viewed down the Crystallographic $\alpha$ -axis

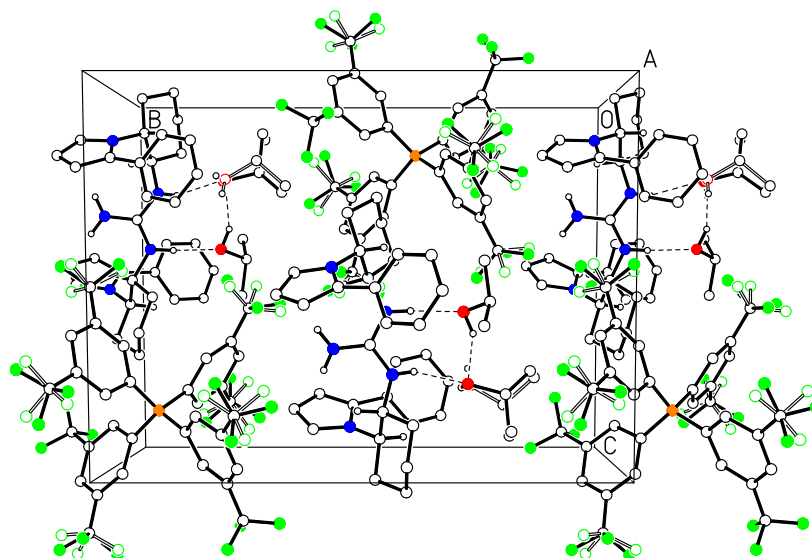

## Hydrogen-bonding Interactions Between the Guanidinium Ion and Two Isopropanol Molecules

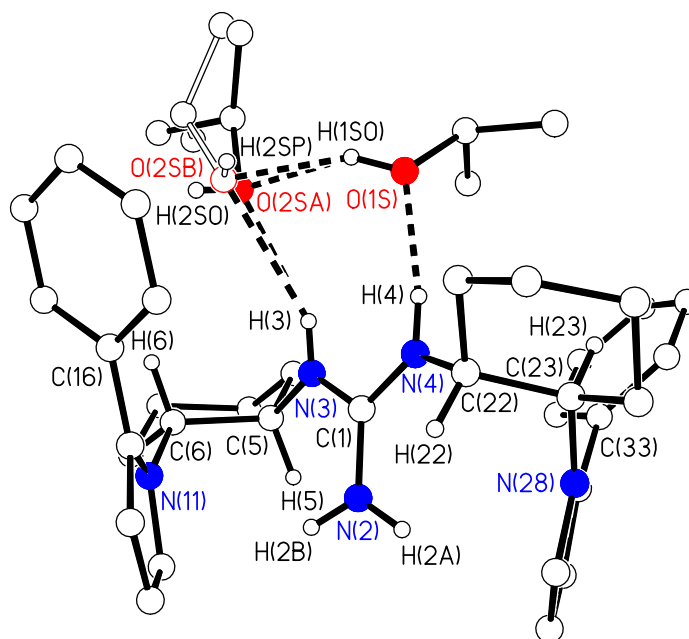

## 9. Computational Modeling of the Guanidinium-Bound Transition State

Calculations were performed using Gaussian 98<sup>6</sup> at the B3LYP<sup>7</sup> level of density functional theory with the 6-31G(d)<sup>8</sup> basis set. The transition structure was fully optimized and verified to be a first-order saddle point by the existence of a single imaginary frequency. Qualitatively, this imaginary frequency corresponds to the simultaneous C-O bond breaking and C-C bond making events expected for the Claisen rearrangement.

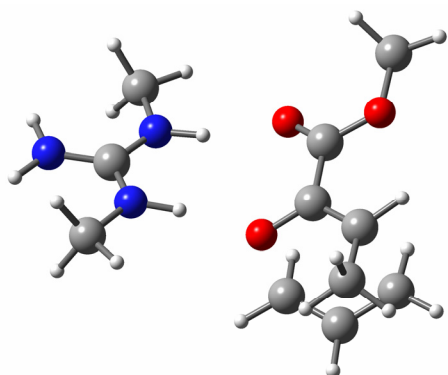

E(RB+HF-LYP) : -822.09356485

|                                          |                             |
|------------------------------------------|-----------------------------|
| Zero-point correction=                   | 0.335591 (Hartree/Particle) |
| Thermal correction to Energy=            | 0.357709                    |
| Thermal correction to Enthalpy=          | 0.358653                    |
| Thermal correction to Gibbs Free Energy= | 0.282051                    |

### Cartesian Coordinates for the Optimized Structure

|   |             |             |             |
|---|-------------|-------------|-------------|
| C | 0.00000000  | 0.00000000  | 0.00000000  |
| C | 2.47106143  | 0.00000000  | 0.00000000  |
| H | 3.22944366  | 0.78327466  | 0.00000000  |
| H | 2.60120287  | -0.60071997 | 0.90775920  |
| H | 2.63531299  | -0.62980925 | -0.88384343 |
| C | -2.46957132 | 0.09171687  | -0.04287683 |
| H | -2.68284370 | -0.48031900 | 0.86916579  |
| H | -3.19672502 | 0.90142115  | -0.11025566 |
| H | -2.59977061 | -0.55471452 | -0.91894916 |
| N | -0.02405621 | -1.34676121 | 0.04698941  |
| N | -1.14274985 | 0.69234596  | -0.01320294 |
| N | 1.16715096  | 0.64983053  | -0.02590515 |
| H | -1.07477783 | 1.71779285  | 0.03052776  |
| H | 1.14587814  | 1.66483482  | -0.17571502 |
| H | -0.89364357 | -1.85239357 | 0.10875975  |
| H | 0.82462091  | -1.88708080 | -0.01239403 |
| H | -2.22938366 | 5.37583189  | 2.59811359  |
| C | -1.21268197 | 5.25937449  | 2.23162906  |
| C | -0.66190941 | 3.97770489  | 2.18379970  |
| C | -0.62720328 | 6.29794050  | 1.53326515  |
| H | 0.39867107  | 3.84229096  | 1.99935903  |
| H | -1.16417241 | 3.14454777  | 2.66376932  |
| H | 0.42470734  | 6.27068202  | 1.26745555  |
| H | -1.09636326 | 7.27587730  | 1.47987046  |
| O | -1.10469211 | 3.49302404  | 0.26010255  |
| C | -0.66586022 | 4.46198431  | -0.47903426 |
| C | -1.37600681 | 5.64026807  | -0.66779040 |
| C | 0.77297692  | 4.35316193  | -0.92720992 |
| H | -0.90017654 | 6.41329273  | -1.26445091 |
| C | -2.86138597 | 5.73978794  | -0.48326022 |
| O | 1.48364054  | 3.38791544  | -0.66986294 |
| O | 1.20056477  | 5.39984704  | -1.63323405 |
| H | -3.23755395 | 4.96576107  | 0.18797364  |
| H | -3.16313445 | 6.72346079  | -0.11004691 |
| H | -3.35056921 | 5.61046401  | -1.45911552 |
| C | 2.56058836  | 5.34501804  | -2.12171584 |
| H | 2.70487169  | 6.27401525  | -2.67100436 |
| H | 3.25956502  | 5.27540730  | -1.28543403 |
| H | 2.68749789  | 4.48206732  | -2.77890569 |

## 10. References

1. Larrow, J. F.; Jacobsen, E. N.; Gao, Y.; Hong, Y.; Nie, X.; Zepp, C. M. *J. Org. Chem.* **1994**, *59*, 1939–1942.
2. Linton, B. R.; Carr, A. J.; Orner, B. P.; Hamilton, A. D. *J. Org. Chem.* **2000**, *65*, 1566–1568.
3. Yakelis, N. A.; Bergman, R. G. *Organometallics*, **2005**, *24*, 3579–3581.
4. Diazomethane was prepared according to the procedure that does not require distillation. A stock solution in Et<sub>2</sub>O (~1M) was stored at -30 °C. Hartt, H. H. *Organic Syntheses, Coll. Vol. 2*. **1943**, 395; *Annual Vol. 16*, **1936**, 51.
5. (a) Abraham, L.; Czerwonka, R.; Hiersemann, M. *Angew. Chem., Int. Ed.* **2001**, *40*, 4700–4703. (b) Abraham, L.; Körner, M.; Schwab, P.; Hiersemann, M. *Adv. Synth. Catal.* **2004**, *346*, 1281–1294.
6. Gaussian 98, Revision A.11.3, Frisch, M. J.; Trucks, G. W.; Schlegel, H. B.; Scuseria, G. E.; Robb, M. A.; Cheeseman, J. R.; Zakrzewski, V. G.; Montgomery, Jr., J. A.; Stratmann, R. E.; Burant, J. C.; Dapprich, S.; Millam, J. M.; Daniels, A. D.; Kudin, K. N.; Strain, M. C.; Farkas, O.; Tomasi, J.; Barone, V.; Cossi, M.; Cammi, R.; Mennucci, B.; Pomelli, C.; Adamo, C.; Clifford, S.; Ochterski, J.; Petersson, G. A.; Ayala, P. Y.; Cui, Q.; Morokuma, K.; Rega, N.; Salvador, P.; Dannenberg, J. J.; Malick, D. K.; Rabuck, A. D.; Raghavachari, K.; Foresman, J. B.; Cioslowski, J.; Ortiz, J. V.; Baboul, A. G.; Stefanov, B. B.; Liu, G.; Liashenko, A.; Piskorz, P.; Komaromi, I.; Gomperts, R.; Martin, R. L.; Fox, D. J.; Keith, T.; Al-Laham, M. A.; Peng, C. Y.; Nanayakkara, A.; Challacombe, M.; Gill, P. M. W.; Johnson, B.; Chen, W.; Wong, M. W.; Gonzalez, C.; Head-Gordon, M.; Replogle, E. S.; Pople, J. A.; Gaussian, Inc., Pittsburgh PA, 2002.
7. B3LYP = Becke-3-Lee-Yang-Parr density functional theory. (a) Becke, A. D. *J. Chem. Phys.* **1993**, *98*, 1372–1377. (b) Lee, C.; Yang, W.; Parr, R. G. *Phys. Rev. B* **1988**, *37*, 785–789.
8. (a) Ditchfield, R.; Hehre, W. J.; Pople, J. A. *J. Chem. Phys.* **1971**, *54*, 724–728. (b) Hehre, W. J.; Ditchfield, R.; Pople, J. A. *J. Chem. Phys.* **1972**, *56*, 2257–2261. (c) Hariharan, P. C.; Pople, J. A. *Theor. Chim. Acta.* **1973**, *28*, 213–223.
